# Supplementary material
Source: HighWire-hosted journal article supplement (https://bmjopensem.bmj.com/content/9/4/e001605)
Supplement: inline-supplementary-material-1 [file inline-supplementary-material-1.pdf]

### Appendix 1. Search strategies for literature searches in PubMed, Web of Science, CINAHL, and SPORTDiscus.

| Database | Search Strategy                                                                                                                                                                                                                                                                                                                                                                                                                                                                                                                                                                                                                                                                                                                                                                                                                                                                                                                                                                                                                                                                                                                                                                                                                                                                                                                                                                                                                                                                                                                                                                                                                                                                                                                                                                                                                                                                                                                                                                                                                                                                                                                                                                                                                                                                                                                                                                                                                                                                                                                                                                                                                                                                                                                                                                                                                                                                                                                                                                                                                                                                                                                                                                                                                                                                                                                                                                                                                                                                                                                                                                                                                                                                                                                                                                                                   |
|----------|-------------------------------------------------------------------------------------------------------------------------------------------------------------------------------------------------------------------------------------------------------------------------------------------------------------------------------------------------------------------------------------------------------------------------------------------------------------------------------------------------------------------------------------------------------------------------------------------------------------------------------------------------------------------------------------------------------------------------------------------------------------------------------------------------------------------------------------------------------------------------------------------------------------------------------------------------------------------------------------------------------------------------------------------------------------------------------------------------------------------------------------------------------------------------------------------------------------------------------------------------------------------------------------------------------------------------------------------------------------------------------------------------------------------------------------------------------------------------------------------------------------------------------------------------------------------------------------------------------------------------------------------------------------------------------------------------------------------------------------------------------------------------------------------------------------------------------------------------------------------------------------------------------------------------------------------------------------------------------------------------------------------------------------------------------------------------------------------------------------------------------------------------------------------------------------------------------------------------------------------------------------------------------------------------------------------------------------------------------------------------------------------------------------------------------------------------------------------------------------------------------------------------------------------------------------------------------------------------------------------------------------------------------------------------------------------------------------------------------------------------------------------------------------------------------------------------------------------------------------------------------------------------------------------------------------------------------------------------------------------------------------------------------------------------------------------------------------------------------------------------------------------------------------------------------------------------------------------------------------------------------------------------------------------------------------------------------------------------------------------------------------------------------------------------------------------------------------------------------------------------------------------------------------------------------------------------------------------------------------------------------------------------------------------------------------------------------------------------------------------------------------------------------------------------------------------|
| PubMed   | <p>((("Athletes"[Mesh] OR Athlete[Title/abstract] OR Athletes[Title/Abstract] OR "Elite Athletes"[Title/Abstract] OR "Elite Athlete"[Title/Abstract] OR "College Athletes"[Title/Abstract] OR "College Athlete"[Title/Abstract] OR Athletics[Title/Abstract] OR Athletic[Title/Abstract]) AND (("Physical Functional Performance"[Mesh] OR "Physical Functional Performance" OR "Physical Functional Performances" OR "Functional Performance" OR "Functional Performances" OR "Physical Performance" OR "Physical Performances" OR "Walk Test"[Mesh] OR "Walk Test" OR "Walk Tests" OR "Incremental Shuttle Walk Test" OR "Endurance Shuttle Walk Test" OR "6-Minute Walk Test" OR "6 Minute Walk Test" OR "6-Minute Walk Tests" OR "6-Min Walk Test" OR "6 Min Walk Test" OR "6-Min Walk Tests" OR "Six-Minute Walk Test" OR "Six Minute Walk Test" OR "Six-Minute Walk Tests" OR "Six Minute Walk Tests" OR "30 second chair stand test" OR "sit to stand test" OR "Stair climb test" OR "Timed up and go test" OR "Berg balance test" OR "Functional reach test" OR "Stair Climbing"[Mesh] OR "Stair Climbing" OR "stair navigation" OR "performance based measure" OR "performance-based measure" OR "performance based measures" OR "performance-based measures")) OR ("Blood Chemical Analysis"[Mesh] OR "blood chemical analysis" OR "Blood Chemical Analyses" OR "Blood Pressure"[Mesh] OR "Blood Pressure" OR "Pulse Pressure" OR "Systolic Pressure" OR "Lipids"[Mesh] OR Lipid OR Lipids OR "Cholesterol"[Mesh] OR Cholesterol OR Epicholesterol OR "total cholesterol" OR "Hypertension"[Mesh] OR Hypertension OR "high blood pressure" OR "high blood pressures" OR "Glucose Intolerance"[Mesh] OR "Glucose Intolerance" OR "Glucose Intolerances" OR "Impaired Glucose Tolerance" OR "Impaired Glucose Tolerances" OR "Lipoproteins, LDL"[Mesh] OR "LDL Lipoproteins" OR "beta-Lipoprotein" OR "beta Lipoprotein" OR "Low-Density Lipoproteins" OR "Low Density Lipoproteins" OR "beta-Lipoproteins" OR "beta Lipoproteins" OR "Low-Density Lipoprotein" OR "Low Density Lipoprotein" OR "LDL-2" OR LDL2 OR "Low-Density Lipoprotein 2" OR "Low Density Lipoprotein 2" OR "LDL-1" OR LDL1 OR "Low-Density Lipoprotein 1" OR "Low Density Lipoprotein 1" OR "Lipoproteins, HDL"[Mesh] OR "HDL Lipoproteins" OR "High-Density Lipoprotein" OR "High-Density Lipoproteins" OR "High Density Lipoproteins" OR "alpha-Lipoproteins" OR "alpha Lipoproteins" OR "Heavy Lipoproteins" OR "High Density Lipoprotein" OR "alpha-Lipoprotein" OR "alpha Lipoprotein" OR "alpha-1 Lipoprotein" OR "Triglycerides"[Mesh] OR Triglycerides OR Triacylglycerols OR Triacylglycerol OR Triglyceride OR "Body Mass Index"[Mesh] OR "Body Mass Index" OR "quetelet index" OR "quetelet's index" OR "quetelets index" OR BMI OR "Body Composition"[Mesh] OR "Body Composition" OR "Body Compositions" OR "Waist Circumference"[Mesh] OR "Waist Circumference" OR "Waist Circumferences" OR "Body Fat Distribution"[Mesh] OR "Body Fat Distribution" OR "Body Fat Patterning" OR "Adiposity"[Mesh] OR "Adiposity" OR "Skinfold Thickness"[Mesh] OR "Skinfold Thickness" OR "Skinfold Thicknesses" OR "Obesity"[Mesh] OR Obese* OR "Overweight"[Mesh] OR "Overweight" OR "Body fat percentage" OR "Waist-Hip Ratio"[Mesh] OR "Waist-Hip Ratio" OR "Waist Hip Ratio" OR "Waist-Hip Ratios" OR "Waist-to-Hip Ratio" OR "Waist to Hip Ratio" OR "Waist-to-Hip Ratios" OR "Glycated Hemoglobin A"[Mesh] OR "Glycated Hemoglobin A" OR "Hb A1a+b" OR "Hb A1c" OR "HbA1" OR "Glycosylated Hemoglobin A" OR "Hb A1" OR "Glycohemoglobin A" OR "Hb A1b" OR "Glycosylated A1b Hemoglobin" OR "Glycated Hemoglobin A1c" OR "Glycosylated Hemoglobin A1c" OR "Glycated Hemoglobins" OR "Glycosylated Hemoglobin" OR "Glycated</p> |

|                       |                                                                                                                                                                                                                                                                                                                                                                                                                                                                                                                                                                                                                                                                                                                                                                                                                                                                                                                                                                                                                                                                                                                                                                                                                                                                                                                                                                                                                                                                                                                                                                                                                                                                                                                                                                                                                                                                                                                                                                                                                                                                                                                                                                                                                                                                                                                                                                                                                                                                                                                                                                                                                                                                                                                                                                                                                                                                                                                                                                                                                                                                                                                                                                                                                                                                                                                                                                                                                                                                                                                                                            |
|-----------------------|------------------------------------------------------------------------------------------------------------------------------------------------------------------------------------------------------------------------------------------------------------------------------------------------------------------------------------------------------------------------------------------------------------------------------------------------------------------------------------------------------------------------------------------------------------------------------------------------------------------------------------------------------------------------------------------------------------------------------------------------------------------------------------------------------------------------------------------------------------------------------------------------------------------------------------------------------------------------------------------------------------------------------------------------------------------------------------------------------------------------------------------------------------------------------------------------------------------------------------------------------------------------------------------------------------------------------------------------------------------------------------------------------------------------------------------------------------------------------------------------------------------------------------------------------------------------------------------------------------------------------------------------------------------------------------------------------------------------------------------------------------------------------------------------------------------------------------------------------------------------------------------------------------------------------------------------------------------------------------------------------------------------------------------------------------------------------------------------------------------------------------------------------------------------------------------------------------------------------------------------------------------------------------------------------------------------------------------------------------------------------------------------------------------------------------------------------------------------------------------------------------------------------------------------------------------------------------------------------------------------------------------------------------------------------------------------------------------------------------------------------------------------------------------------------------------------------------------------------------------------------------------------------------------------------------------------------------------------------------------------------------------------------------------------------------------------------------------------------------------------------------------------------------------------------------------------------------------------------------------------------------------------------------------------------------------------------------------------------------------------------------------------------------------------------------------------------------------------------------------------------------------------------------------------------------|
|                       | <p>Hemoglobin" OR "C-Reactive Protein"[Mesh] OR "C-Reactive Protein" OR "C Reactive Protein" OR hsCRP OR "High Sensitivity C-Reactive Protein" OR "High Sensitivity C Reactive Protein" OR "hs-CRP")) AND ("Middle Aged"[Mesh] OR "Middle Aged" OR "Middle-age" OR "middle age" OR "Mid-life" OR Midlife) NOT ("Brain Concussion"[Mesh] OR "Brain Concussion" OR "Brain Concussions" OR "Commotio Cerebri" OR "Cerebral Concussion" OR "Cerebral Concussions" OR "Severe Concussion" OR "Severe Concussions" OR "Mild Concussion" OR "Mild Concussions" OR "Mild Traumatic Brain Injury" OR "sports-related concussion" OR "sports related concussion" OR "sport-related concussions" OR "sport-related concussions" OR SRC OR "Brain Injuries"[Mesh] OR "Brain Injuries" OR "Brain Injury" OR "Acute Brain Injuries" OR "Acute Brain Injury" OR "Brain Lacerations" OR "Brain Laceration" OR "Focal Brain Injury" OR "Focal Brain Injuries" OR "Stroke"[Mesh] OR Stroke OR Strokes OR "Cerebrovascular Accident" OR "Cerebrovascular Accidents" OR CVA OR CVAs OR "Cerebrovascular Apoplexy" OR "Brain Vascular Accident" OR "Brain Vascular Accidents" OR "Cerebrovascular Stroke" OR "Cerebrovascular Strokes" OR Apoplexy OR "Cerebral Stroke" OR "Cerebral Strokes" OR "Acute Stroke" OR "Acute Cerebrovascular Accident" OR "Acute Cerebrovascular Accidents" OR "Parkinson Disease"[Mesh] OR "Parkinson Disease" OR "Idiopathic Parkinson's Disease" OR "Lewy Body Parkinson's Disease" OR "Parkinson's Disease" OR "Idiopathic Parkinson Disease" OR "Lewy Body Parkinson Disease" OR "Primary Parkinsonism" OR "Paralysis Agitans" OR "Multiple Sclerosis"[Mesh] OR "Multiple Sclerosis" OR "Disseminated Sclerosis" OR MS OR "Epilepsy"[Mesh] OR Epilepsy OR Epilepsies OR "Seizure Disorder" OR "Seizure Disorders" OR "Awakening Epilepsy" OR "Cryptogenic Epilepsies" OR "Cryptogenic Epilepsy" OR Aura OR Auras OR "Peripheral Arterial Disease"[Mesh] OR "Peripheral Arterial Disease" OR "Peripheral Arterial Diseases" OR "Peripheral Artery Diseases" OR "Peripheral Artery Disease" OR "Diabetes Mellitus"[Mesh] OR "Diabetes Mellitus" OR diabetes OR "Brain damage" OR "Craniocerebral Trauma"[Mesh] OR "Craniocerebral Trauma" OR "Craniocerebral Traumas" OR "Head Injuries" OR "Craniocerebral Injuries" OR "Craniocerebral Injury" OR "Head Injury" OR "Head Trauma" OR "Head Traumas" OR "Minor Head Injuries" OR "Minor Head Injury" OR "Multiple Head Injury" OR "Multiple Head Injuries" OR "Open Head Injuries" OR "Open Head Injury" OR "Superficial Head Injuries" OR "Superficial Head Injury" OR "Occipital Trauma" OR "Occipital Traumas" OR "Frontal Region Trauma" OR "Forehead Trauma" OR "Spine"[Mesh] OR Spine OR "Vertebral Column" OR "Vertebral Columns" OR "Spinal Column" OR "Spinal Columns" OR Vertebra OR Vertebrae OR "Spinal Cord"[Mesh] OR "Spinal Cord" OR "Spinal Cords" OR "Medulla Spinalis" OR Myelon OR Myelons OR "Coccygeal Cord" OR "Conus Medullaris" OR "Conus Medullari" OR "Conus Terminalis" OR "Thoracic Cord" OR "Thoracic Cords" OR "Lumbar Cord" OR "Lumbar Cords" OR "Sacral Cord" OR "Sacral Cords" OR "Prostheses and Implants"[Mesh] OR "Prostheses and Implants" OR "Implants and Prostheses" OR "Prosthetic Implants" OR "Prostheses and Implant" OR "Implant and Prostheses" OR "Prosthetic Implant" OR Endoprosthesis OR Endoprostheses OR Prostheses OR Prosthesis OR "Artificial Implant" OR "Artificial Implants")</p> <p>Filters: English, from 2000/1/1 - 2022/12/31</p> |
| <b>Web of Science</b> | <p>Athlete* OR "Elite Athlete*" OR "College Athlete*" OR Athletic* (Title) or Athlete* OR "Elite Athlete*" OR "College Athlete*" OR Athletic* (Abstract) AND "Physical Functional Performance*" OR "Functional Performance*" OR "Physical Performance*" OR "Walk Test*" OR "Incremental Shuttle Walk Test" OR "Endurance Shuttle Walk Test" OR "6-Min* Walk Test*" OR "6 Min* Walk Test*" OR "Six-Minute Walk Test*" OR "Six Minute Walk Test*" OR</p>                                                                                                                                                                                                                                                                                                                                                                                                                                                                                                                                                                                                                                                                                                                                                                                                                                                                                                                                                                                                                                                                                                                                                                                                                                                                                                                                                                                                                                                                                                                                                                                                                                                                                                                                                                                                                                                                                                                                                                                                                                                                                                                                                                                                                                                                                                                                                                                                                                                                                                                                                                                                                                                                                                                                                                                                                                                                                                                                                                                                                                                                                                     |

|  |                                                                                                                                                                                                                                                                                                                                                                                                                                                                                                                                                                                                                                                                                                                                                                                                                                                                                                                                                                                                                                                                                                                                                                                                                                                                                                                                                                                                                                                                                                                                                                                                                                                                                                                                                                                                                                                                                                                                                                                                                                                                                                                                                                                                                                                                                                                                                                                                                                                                                                                                                                                                                                                                                                                                                                                                                                                                                                                                                                                                                                                                                                                                                                                                                                                                                                                                                                                                                                                                                                                                                                                                                                                                                                                                                                                                                                                                                                                                                                                                                                         |
|--|-----------------------------------------------------------------------------------------------------------------------------------------------------------------------------------------------------------------------------------------------------------------------------------------------------------------------------------------------------------------------------------------------------------------------------------------------------------------------------------------------------------------------------------------------------------------------------------------------------------------------------------------------------------------------------------------------------------------------------------------------------------------------------------------------------------------------------------------------------------------------------------------------------------------------------------------------------------------------------------------------------------------------------------------------------------------------------------------------------------------------------------------------------------------------------------------------------------------------------------------------------------------------------------------------------------------------------------------------------------------------------------------------------------------------------------------------------------------------------------------------------------------------------------------------------------------------------------------------------------------------------------------------------------------------------------------------------------------------------------------------------------------------------------------------------------------------------------------------------------------------------------------------------------------------------------------------------------------------------------------------------------------------------------------------------------------------------------------------------------------------------------------------------------------------------------------------------------------------------------------------------------------------------------------------------------------------------------------------------------------------------------------------------------------------------------------------------------------------------------------------------------------------------------------------------------------------------------------------------------------------------------------------------------------------------------------------------------------------------------------------------------------------------------------------------------------------------------------------------------------------------------------------------------------------------------------------------------------------------------------------------------------------------------------------------------------------------------------------------------------------------------------------------------------------------------------------------------------------------------------------------------------------------------------------------------------------------------------------------------------------------------------------------------------------------------------------------------------------------------------------------------------------------------------------------------------------------------------------------------------------------------------------------------------------------------------------------------------------------------------------------------------------------------------------------------------------------------------------------------------------------------------------------------------------------------------------------------------------------------------------------------------------------------------|
|  | <p> "30 second chair stand test" OR "sit to stand test" OR "Stair climb test" OR "Timed up and go test" OR "Berg balance test" OR "Functional reach test" OR "Stair Climb*" OR "stair navigat*" OR "performance based measure*" OR "performance-based measure*" OR "blood chemical analysis" OR "Blood Chemical Analyses" OR "Blood Pressure" OR "Pulse Pressure" OR "Systolic Pressure" OR Lipid OR Lipids OR Cholesterol OR Epicholesterol OR "total cholesterol" OR Hypertension OR "high blood pressure*" OR "Glucose Intolerance*" OR "Impaired Glucose Tolerance*" OR "LDL Lipoproteins" OR "beta-Lipoprotein" OR "beta Lipoprotein" OR "Low-Density Lipoprotein*" OR "Low Density Lipoprotein*" OR "beta-Lipoproteins" OR "beta Lipoproteins" OR "LDL-2" OR LDL2 OR "Low-Density Lipoprotein 2" OR "Low Density Lipoprotein 2" OR "LDL-1" OR LDL1 OR "Low-Density Lipoprotein 1" OR "Low Density Lipoprotein 1" OR "HDL Lipoproteins" OR "High-Density Lipoprotein*" OR "High Density Lipoprotein*" OR "alpha-Lipoprotein*" OR "alpha Lipoprotein*" OR "Heavy Lipoprotein*" OR "alpha-1 Lipoprotein" OR Triglycerides OR Triacylglycerols OR Triacylglycerol OR Triglyceride OR "Body Mass Index" OR "quetelet index" OR "quetelet's index" OR "quetelets index" OR BMI OR "Body Composition*" OR "Waist Circumference*" OR "Body Fat Distribution" OR "Body Fat Patterning" OR "Adiposity" OR "Skinfold Thickness*" OR Obes* OR "Overweight" OR "Body fat percentage" OR "Waist-Hip Ratio*" OR "Waist Hip Ratio*" OR "Waist-to-Hip Ratio*" OR "Waist to Hip Ratio*" OR "Glycated Hemoglobin A" OR "Hb A1a+b" OR "Hb A1c" OR "HbA1" OR "Glycosylated Hemoglobin A" OR "Hb A1" OR "Glycohemoglobin A" OR "Hb A1b" OR "Glycosylated A1b Hemoglobin" OR "Glycated Hemoglobin A1c" OR "Glycosylated Hemoglobin A1c" OR "Glycated Hemoglobin*" OR "Glycosylated Hemoglobin" OR "C-Reactive Protein" OR "C Reactive Protein" OR hsCRP OR "High Sensitivity C-Reactive Protein" OR "High Sensitivity C Reactive Protein" OR "hs-CRP" (All Fields) AND "Middle-age*" OR "middle age*" OR "Mid-life" OR Midlife (All Fields) NOT "Brain Concussion*" OR "Commotio Cerebri" OR "Cerebral Concussion*" OR "Severe Concussion*" OR "Mild Concussion*" OR "Mild Traumatic Brain Injury" OR "sports-related concussion*" OR "sports related concussion*" OR SRC OR "Brain Injur*" OR "Acute Brain Injur*" OR "Brain Laceration*" OR "Focal Brain Injur*" OR Stroke OR Strokes OR "Cerebrovascular Accident*" OR CVA OR CVAs OR "Cerebrovascular Apoplexy" OR "Brain Vascular Accident*" OR "Cerebrovascular Stroke*" OR Apoplexy OR "Cerebral Stroke*" OR "Acute Stroke" OR "Acute Cerebrovascular Accident*" OR "Parkinson Disease" OR "Idiopathic Parkinson's Disease" OR "Lewy Body Parkinson's Disease" OR "Parkinson's Disease" OR "Idiopathic Parkinson Disease" OR "Lewy Body Parkinson Disease" OR "Primary Parkinsonism" OR "Paralysis Agitans" OR "Multiple Sclerosis" OR "Disseminated Sclerosis" OR MS OR Epileps* OR "Seizure Disorder*" OR "Awakening Epilepsy" OR "Cryptogenic Epileps*" OR Aura OR Auras OR "Peripheral Arterial Disease*" OR "Peripheral Artery Disease*" OR "Diabetes Mellitus" OR Diabetes OR "Brain damage" OR "Cranio-cerebral Trauma*" OR "Head Injur*" OR "Cranio-cerebral Injur*" OR "Head Trauma*" OR "Minor Head Injur*" OR "Multiple Head Injur*" OR "Open Head Injur*" OR "Superficial Head Injur*" OR "Occipital Trauma*" OR "Frontal Region Trauma" OR "Forehead Trauma" OR Spine* OR "Vertebral Column*" OR "Spinal Column*" OR Vertebra OR Vertebrae OR "Spinal Cord*" OR "Medulla Spinalis" OR Myelon OR Myelons OR "Coccygeal Cord" OR "Conus Medullaris" OR "Conus Medullari" OR "Conus Terminalis" OR "Thoracic Cord*" OR "Lumbar Cord*" OR "Sacral Cord*" OR "Prosthes* and Implant*" OR "Implant* and Prosthes*" OR "Prosthetic Implant*" OR Endoprosthesis OR Endoprostheses OR Prostheses OR Prosthesis OR "Artificial Implant*" (All Fields) </p> <p>Refine to English; 2000-2022</p> |
|--|-----------------------------------------------------------------------------------------------------------------------------------------------------------------------------------------------------------------------------------------------------------------------------------------------------------------------------------------------------------------------------------------------------------------------------------------------------------------------------------------------------------------------------------------------------------------------------------------------------------------------------------------------------------------------------------------------------------------------------------------------------------------------------------------------------------------------------------------------------------------------------------------------------------------------------------------------------------------------------------------------------------------------------------------------------------------------------------------------------------------------------------------------------------------------------------------------------------------------------------------------------------------------------------------------------------------------------------------------------------------------------------------------------------------------------------------------------------------------------------------------------------------------------------------------------------------------------------------------------------------------------------------------------------------------------------------------------------------------------------------------------------------------------------------------------------------------------------------------------------------------------------------------------------------------------------------------------------------------------------------------------------------------------------------------------------------------------------------------------------------------------------------------------------------------------------------------------------------------------------------------------------------------------------------------------------------------------------------------------------------------------------------------------------------------------------------------------------------------------------------------------------------------------------------------------------------------------------------------------------------------------------------------------------------------------------------------------------------------------------------------------------------------------------------------------------------------------------------------------------------------------------------------------------------------------------------------------------------------------------------------------------------------------------------------------------------------------------------------------------------------------------------------------------------------------------------------------------------------------------------------------------------------------------------------------------------------------------------------------------------------------------------------------------------------------------------------------------------------------------------------------------------------------------------------------------------------------------------------------------------------------------------------------------------------------------------------------------------------------------------------------------------------------------------------------------------------------------------------------------------------------------------------------------------------------------------------------------------------------------------------------------------------------------------|

|                      |                                                                                                                                                                                                                                                                                                                                                                                                                                                                                                                                                                                                                                                                                                                                                                                                                                                                                                                                                                                                                                                                                                                                                                                                                                                                                                                                                                                                                                                                                                                                                                                                                                                                                                                                                                                                                                                                                                                                                                                                                                                                                                                                                                                                                                                                                                                                                                                                                                                                                                                                                                                                                                                                                                                                                                                                                                                                                                                                                                                                                                                                                                                                                                                                                                                                                                                                                                                                                                                                                                                                                                                                                                                                                                                                                                                                                                                                                                                                                                                                                                                                                                                                                                       |
|----------------------|-----------------------------------------------------------------------------------------------------------------------------------------------------------------------------------------------------------------------------------------------------------------------------------------------------------------------------------------------------------------------------------------------------------------------------------------------------------------------------------------------------------------------------------------------------------------------------------------------------------------------------------------------------------------------------------------------------------------------------------------------------------------------------------------------------------------------------------------------------------------------------------------------------------------------------------------------------------------------------------------------------------------------------------------------------------------------------------------------------------------------------------------------------------------------------------------------------------------------------------------------------------------------------------------------------------------------------------------------------------------------------------------------------------------------------------------------------------------------------------------------------------------------------------------------------------------------------------------------------------------------------------------------------------------------------------------------------------------------------------------------------------------------------------------------------------------------------------------------------------------------------------------------------------------------------------------------------------------------------------------------------------------------------------------------------------------------------------------------------------------------------------------------------------------------------------------------------------------------------------------------------------------------------------------------------------------------------------------------------------------------------------------------------------------------------------------------------------------------------------------------------------------------------------------------------------------------------------------------------------------------------------------------------------------------------------------------------------------------------------------------------------------------------------------------------------------------------------------------------------------------------------------------------------------------------------------------------------------------------------------------------------------------------------------------------------------------------------------------------------------------------------------------------------------------------------------------------------------------------------------------------------------------------------------------------------------------------------------------------------------------------------------------------------------------------------------------------------------------------------------------------------------------------------------------------------------------------------------------------------------------------------------------------------------------------------------------------------------------------------------------------------------------------------------------------------------------------------------------------------------------------------------------------------------------------------------------------------------------------------------------------------------------------------------------------------------------------------------------------------------------------------------------------------------------|
| <p><b>CINAHL</b></p> | <p>( (MH "Athletes") OR (TI Athlete*) OR (AB Athlete*) OR (TI "Elite Athlete*") OR (AB "Elite Athlete*") OR (TI "College Athlete*") OR (AB "College Athlete*") OR (TI athletic*) OR (AB athletic*) ) AND ( (MH "Physical Performance") OR "Physical Performance*" OR "Physical Functional Performance*" OR "Functional Performance*" OR "Walk Test*" OR "Incremental Shuttle Walk Test" OR "Endurance Shuttle Walk Test" OR "6-Min* Walk Test*" OR "6 Min* Walk Test*" OR "Six-Minute Walk Test*" OR "Six Minute Walk Test*" OR "30 second chair stand test" OR "sit to stand test" OR "Stair climb test" OR "Timed up and go test" OR "Berg balance test" OR "Functional reach test" OR (MH "Stair Climbing") OR "Stair Climbing" OR "stair navigation" OR "performance based measure*" OR "performance-based measure*" OR (MH "Blood Chemical Analysis") OR "blood chemical analysis" OR "Blood Chemical Analyses" OR "blood chemistry test*" OR (MH "Blood Pressure") OR "Blood Pressure*" OR "Pulse Pressure*" OR "Systolic Pressure*" OR (MH "Lipids") OR Lipid OR Lipids OR (MH "Cholesterol") OR Cholesterol OR Epicholesterol OR "total cholesterol" OR (MH "Hypertension") OR Hypertension* OR "high blood pressure*" OR (MH "Glucose Intolerance") OR "Glucose Intolerance*" OR "Impaired Glucose Tolerance*" OR (MH "Lipoproteins, LDL") OR "LDL Lipoprotein*" OR "beta-Lipoprotein*" OR "beta Lipoprotein*" OR "Low-Density Lipoprotein*" OR "Low Density Lipoprotein*" OR "LDL-2" OR LDL2 OR "Low-Density Lipoprotein 2" OR "Low Density Lipoprotein 2" OR "LDL-1" OR LDL1 OR "Low-Density Lipoprotein 1" OR "Low Density Lipoprotein 1" OR (MH "Lipoproteins, HDL") OR "HDL Lipoproteins" OR "High-Density Lipoprotein*" OR "High Density Lipoprotein*" OR "alpha-Lipoprotein*" OR "alpha Lipoprotein*" OR "Heavy Lipoprotein*" OR "alpha-1 Lipoprotein" OR (MH "Triglycerides") OR Triglyceride* OR Triacylglycerol* OR (MH "Body Mass Index") OR "Body Mass Index" OR "quetelet index" OR "quetelet's index" OR "quetelets index" OR BMI OR "BMI mapping" OR (MH "Body Composition") OR "Body Composition*" OR (MH "Waist Circumference") OR "Waist Circumference*" OR "Abdomen Size" OR "Waist Size" OR (MH "Adipose Tissue Distribution") OR "adipose tissue distribution" OR "Body Fat Distribution" OR "Body Fat Patterning" OR "Subcutaneous Fat Distribution" OR "Visceral Fat Distribution" OR (MH "Adipose Tissue") OR Adiposity OR "Adipose Tissue*" OR "Body Fat" OR Cellulite OR "Fatty Tissue" OR (MH "Abdominal Fat") OR "Abdominal Fat" OR "Abdominal Adipose Tissue" OR (MH "Skinfold Thickness") OR "Skinfold Thickness*" OR (MH "Obesity") OR Obes* OR Overweight OR "over weight" OR "Body fat percentage" OR (MH "Waist-Hip Ratio") OR "Waist-Hip Ratio*" OR "Waist Hip Ratio*" OR "Waist-to-Hip Ratio*" OR "Waist to Hip Ratio*" OR (MH "Hemoglobin A, Glycosylated") OR "Glycated Hemoglobin A" OR "Hb A1a+b" OR "Hb A1c" OR "Glycosylated Hemoglobin A" OR HBA1C OR HbA1 OR "Hb A1" OR "Glycohemoglobin A" OR "Hb A1b" OR "Glycosylated A1b Hemoglobin" OR "Glycated Hemoglobin A1c" OR "Glycosylated Hemoglobin A1c" OR "Glycosylated Hemoglobin" OR "Glycated Hemoglobin*" OR (MH "C-Reactive Protein") OR "C-Reactive Protein" OR "C Reactive Protein" OR hsCRP OR "High Sensitivity C-Reactive Protein" OR "High Sensitivity C Reactive Protein" OR "hs-CRP" ) AND ( (MH "Middle Age") OR "Middle Age*" OR "Middle-age" OR "Mid-life" OR Midlife ) NOT ( (MH "Brain Concussion") OR "Brain Concussion*" OR "Commotio Cerebri" OR "Cerebral Concussion*" OR "Severe Concussion*" OR "Mild Concussion*" OR "Mild Traumatic Brain Injury" OR "sports-related concussion*" OR "sports related concussion*" OR SRC OR (MH "Brain Injuries") OR "Brain Injur*" OR "Acute Brain Injur*" OR "Brain Laceration*" OR "Focal Brain Injur*" OR "Acquired Brain Injur*" OR "Traumatic Brain Injur*" OR TBI OR TBIs OR (MH "Stroke") OR Stroke OR Strokes OR "Cerebrovascular Accident*" OR CVA OR CVAs OR "Cerebrovascular Apoplexy" OR "Brain Vascular Accident*" OR "Cerebrovascular Stroke*" OR Apoplexy OR "Cerebral Stroke*" OR</p> |
|----------------------|-----------------------------------------------------------------------------------------------------------------------------------------------------------------------------------------------------------------------------------------------------------------------------------------------------------------------------------------------------------------------------------------------------------------------------------------------------------------------------------------------------------------------------------------------------------------------------------------------------------------------------------------------------------------------------------------------------------------------------------------------------------------------------------------------------------------------------------------------------------------------------------------------------------------------------------------------------------------------------------------------------------------------------------------------------------------------------------------------------------------------------------------------------------------------------------------------------------------------------------------------------------------------------------------------------------------------------------------------------------------------------------------------------------------------------------------------------------------------------------------------------------------------------------------------------------------------------------------------------------------------------------------------------------------------------------------------------------------------------------------------------------------------------------------------------------------------------------------------------------------------------------------------------------------------------------------------------------------------------------------------------------------------------------------------------------------------------------------------------------------------------------------------------------------------------------------------------------------------------------------------------------------------------------------------------------------------------------------------------------------------------------------------------------------------------------------------------------------------------------------------------------------------------------------------------------------------------------------------------------------------------------------------------------------------------------------------------------------------------------------------------------------------------------------------------------------------------------------------------------------------------------------------------------------------------------------------------------------------------------------------------------------------------------------------------------------------------------------------------------------------------------------------------------------------------------------------------------------------------------------------------------------------------------------------------------------------------------------------------------------------------------------------------------------------------------------------------------------------------------------------------------------------------------------------------------------------------------------------------------------------------------------------------------------------------------------------------------------------------------------------------------------------------------------------------------------------------------------------------------------------------------------------------------------------------------------------------------------------------------------------------------------------------------------------------------------------------------------------------------------------------------------------------------------------|

|             |                                                                                                                                                                                                                                                                                                                                                                                                                                                                                                                                                                                                                                                                                                                                                                                                                                                                                                                                                                                                                                                                                                                                                                                                                                                                                                                                                                                                                                                                                                                                                                                                                                                                                                                                                                                                                                                                                                                                                                                                                                                                                                                                                                                                                                                                                                                  |
|-------------|------------------------------------------------------------------------------------------------------------------------------------------------------------------------------------------------------------------------------------------------------------------------------------------------------------------------------------------------------------------------------------------------------------------------------------------------------------------------------------------------------------------------------------------------------------------------------------------------------------------------------------------------------------------------------------------------------------------------------------------------------------------------------------------------------------------------------------------------------------------------------------------------------------------------------------------------------------------------------------------------------------------------------------------------------------------------------------------------------------------------------------------------------------------------------------------------------------------------------------------------------------------------------------------------------------------------------------------------------------------------------------------------------------------------------------------------------------------------------------------------------------------------------------------------------------------------------------------------------------------------------------------------------------------------------------------------------------------------------------------------------------------------------------------------------------------------------------------------------------------------------------------------------------------------------------------------------------------------------------------------------------------------------------------------------------------------------------------------------------------------------------------------------------------------------------------------------------------------------------------------------------------------------------------------------------------|
|             | <p>"Acute Stroke" OR "Acute Cerebrovascular Accident*" OR (MH "Parkinson Disease") OR "Parkinson Disease" OR "Idiopathic Parkinson's Disease" OR "Lewy Body Parkinson's Disease" OR "Parkinson's Disease" OR "Idiopathic Parkinson Disease" OR "Lewy Body Parkinson Disease" OR "Primary Parkinsonism" OR "Paralysis Agitans" OR (MH "Multiple Sclerosis") OR "Multiple Sclerosis" OR "Disseminated Sclerosis" OR MS OR (MH "Epilepsy") OR Epilepsy OR Epilepsies OR "Seizure Disorder*" OR "Awakening Epilepsy" OR "Cryptogenic Epileps*" OR Aura OR Auras OR (MH "Peripheral Vascular Diseases") OR "Peripheral Vascular Disease*" OR "Peripheral Arterial Disease*" OR "Peripheral Artery Disease*" OR "Peripheral Angiopath*" OR "Peripheral Arterial Disease*" OR "Peripheral Vascular Disease*" OR (MH "Diabetes Mellitus") OR "Diabetes Mellitus" OR Diabetes OR "Brain damage" OR "Craniocerebral Trauma*" OR "Head Injur*" OR "Craniocerebral Injur*" OR "Head Trauma*" OR "Minor Head Injur*" OR "Multiple Head Injur*" OR "Open Head Injur*" OR "Superficial Head Injur*" OR "Occipital Trauma*" OR "Frontal Region Trauma*" OR "Forehead Trauma" OR (MH "Spine") OR Spine OR "Vertebral Column*" OR "Spinal Column*" OR Vertebra OR Vertebrae OR (MH "Spinal Cord") OR "Spinal Cord*" OR "Medulla Spinalis" OR Myelon OR Myelons OR "Coccygeal Cord" OR "Conus Medullari*" OR "Conus Terminalis" OR "Thoracic Cord*" OR "Lumbar Cord*" OR "Sacral Cord*" OR (MH "Prostheses and Implants") OR "Prosthes* and Implant*" OR "Implant* and Prothes*" OR "Prosthetic Implant*" OR Endoprosthesis OR Endoprostheses OR Prostheses OR Prosthesis OR "Artificial Implant*" )</p> <p>Limiters - English Language; Published Date: 20000101-20221231</p>                                                                                                                                                                                                                                                                                                                                                                                                                                                                                                                                                      |
| SPORTDiscus | <p>( (DE "ATHLETES") OR (TI Athlete*) OR (AB Athlete*) OR (TI "Elite Athlete*") OR (AB "Elite Athlete*") OR (TI "College Athlete*") OR (AB "College Athlete*") OR (TI athletic*) OR (AB athletic*) ) AND ( (DE "PHYSICAL fitness testing") OR "physical fitness test*" OR "Physical Performance*" OR "Physical Functional Performance*" OR "Functional Performance*" OR (DE "EXERCISE tests") OR "exercise test*" OR "Walk Test*" OR "Incremental Shuttle Walk Test" OR "Endurance Shuttle Walk Test" OR "6-Min* Walk Test*" OR "6 Min* Walk Test*" OR "Six-Minute Walk Test*" OR "Six Minute Walk Test*" OR "30 second chair stand test" OR "sit to stand test" OR "Stair climb test" OR "Timed up and go test" OR "Berg balance test" OR "Functional reach test" OR (DE "STAIR climbing") OR "Stair Climbing" OR "stair navigation" OR "performance based measure*" OR "performance-based measure*" OR (DE "BLOOD testing") OR "blood chemical analysis" OR "Blood Chemical Analyses" OR "blood chemistry test*" OR (DE "BLOOD pressure") OR "Blood Pressure*" OR "Pulse Pressure*" OR "Systolic Pressure*" OR (DE "BLOOD pressure measurement") OR "blood pressure measure*" OR (DE "LIPIDS") OR Lipid OR Lipids OR (DE "CHOLESTEROL") OR Cholesterol OR Epicholesterol OR "total cholesterol" OR (DE "HYPERTENSION") OR Hypertension* OR "high blood pressure*" OR (DE "GLUCOSE intolerance") OR "Glucose Intolerance*" OR "Impaired Glucose Tolerance*" OR (DE "LOW density lipoproteins") OR "LDL Lipoprotein*" OR "beta-Lipoprotein*" OR "beta Lipoprotein*" OR "Low-Density Lipoprotein*" OR "Low Density Lipoprotein*" OR "LDL-2" OR LDL2 OR "Low-Density Lipoprotein 2" OR "Low Density Lipoprotein 2" OR "LDL-1" OR LDL1 OR "Low-Density Lipoprotein 1" OR "Low Density Lipoprotein 1" OR (DE "HIGH density lipoproteins") OR "HDL Lipoproteins" OR "High-Density Lipoprotein*" OR "High Density Lipoprotein*" OR "alpha-Lipoprotein*" OR "alpha Lipoprotein*" OR "Heavy Lipoprotein*" OR "alpha-1 Lipoprotein" OR (DE "TRIGLYCERIDES") OR Triglyceride* OR Triacylglycerol* OR (DE "BODY mass index") OR "Body Mass Index" OR "quetelet index" OR "quetelet's index" OR "quetelets index" OR BMI OR "BMI mapping" OR (DE "BODY composition") OR "Body Composition*" OR "Waist Circumference*" OR</p> |

|                                                                                                                                                                                                                                                                                                                                                                                                                                                                                                                                                                                                                                                                                                                                                                                                                                                                                                                                                                                                                                                                                                                                                                                                                                                                                                                                                                                                                                                                                                                                                                                                                                                                                                                                                                                                                                                                                                                                                                                                                                                                                                                                                                                                                                                                                                                                                                                                                                                                                                                                                                                                                                                                                                                                                                                                                                                                                                                                                                                                                                                                                                                                                                                                                                                                                                                                                                                                                                                                                                                                                                                                                                                                                                                                                                                                             |
|-------------------------------------------------------------------------------------------------------------------------------------------------------------------------------------------------------------------------------------------------------------------------------------------------------------------------------------------------------------------------------------------------------------------------------------------------------------------------------------------------------------------------------------------------------------------------------------------------------------------------------------------------------------------------------------------------------------------------------------------------------------------------------------------------------------------------------------------------------------------------------------------------------------------------------------------------------------------------------------------------------------------------------------------------------------------------------------------------------------------------------------------------------------------------------------------------------------------------------------------------------------------------------------------------------------------------------------------------------------------------------------------------------------------------------------------------------------------------------------------------------------------------------------------------------------------------------------------------------------------------------------------------------------------------------------------------------------------------------------------------------------------------------------------------------------------------------------------------------------------------------------------------------------------------------------------------------------------------------------------------------------------------------------------------------------------------------------------------------------------------------------------------------------------------------------------------------------------------------------------------------------------------------------------------------------------------------------------------------------------------------------------------------------------------------------------------------------------------------------------------------------------------------------------------------------------------------------------------------------------------------------------------------------------------------------------------------------------------------------------------------------------------------------------------------------------------------------------------------------------------------------------------------------------------------------------------------------------------------------------------------------------------------------------------------------------------------------------------------------------------------------------------------------------------------------------------------------------------------------------------------------------------------------------------------------------------------------------------------------------------------------------------------------------------------------------------------------------------------------------------------------------------------------------------------------------------------------------------------------------------------------------------------------------------------------------------------------------------------------------------------------------------------------------------------------|
| <p> "Abdomen Size" OR "Waist Size" OR "adipose tissue distribution" OR "Body Fat Distribution" OR "Body Fat Patterning" OR "Subcutaneous Fat Distribution" OR "Visceral Fat Distribution" OR (DE "FAT") OR (DE "ADIPOSE tissues") OR Adiposity OR "Adipose Tissue*" OR "Body Fat" OR Cellulite OR "Fatty Tissue" OR "Abdominal Fat" OR "Abdominal Adipose Tissue" OR (DE "SKINFOLD thickness") OR "skinfold thickness" OR (DE "OBESITY") OR Obes* OR Overweight OR "over weight" OR "Body fat percentage" OR (DE "WAIST-hip ratio") OR "Waist-Hip Ratio*" OR "Waist Hip Ratio*" OR "Waist-to-Hip Ratio*" OR "Waist to Hip Ratio*" OR "Glycated Hemoglobin A" OR "Hb A1a+b" OR "Hb A1c" OR "Glycosylated Hemoglobin A" OR HBA1C OR HbA1 OR "Hb A1" OR "Glycohemoglobin A" OR "Hb A1b" OR "Glycosylated A1b Hemoglobin" OR "Glycated Hemoglobin A1c" OR "Glycosylated Hemoglobin A1c" OR "Glycosylated Hemoglobin" OR "Glycated Hemoglobin*" OR "C-Reactive Protein" OR "C Reactive Protein" OR hsCRP OR "High Sensitivity C-Reactive Protein" OR "High Sensitivity C Reactive Protein" OR "hs-CRP" ) AND ( "Middle Age*" OR "Middle-age" OR "Mid-life" OR Midlife ) NOT ( (DE "BRAIN concussion") OR "Brain Concussion*" OR "Commotio Cerebri" OR "Cerebral Concussion*" OR "Severe Concussion*" OR "Mild Concussion*" OR "Mild Traumatic Brain Injury" OR "sports-related concussion*" OR "sports related concussion*" OR SRC OR (DE "BRAIN injuries") OR "Brain Injur*" OR "Acute Brain Injur*" OR "Brain Laceration*" OR "Focal Brain Injur*" OR "Acquired Brain Injur*" OR "Traumatic Brain Injur*" OR TBI OR TBIs OR (DE "STROKE") OR Stroke OR Strokes OR "Cerebrovascular Accident*" OR CVA OR CVAs OR "Cerebrovascular Apoplexy" OR "Brain Vascular Accident*" OR "Cerebrovascular Stroke*" OR Apoplexy OR "Cerebral Stroke*" OR "Acute Stroke" OR "Acute Cerebrovascular Accident*" OR (DE "PARKINSON'S disease") OR "Parkinson Disease" OR "Idiopathic Parkinson's Disease" OR "Lewy Body Parkinson's Disease" OR "Parkinson's Disease" OR "Idiopathic Parkinson Disease" OR "Lewy Body Parkinson Disease" OR "Primary Parkinsonism" OR "Paralysis Agitans" OR (DE "MULTIPLE sclerosis") OR "Multiple Sclerosis" OR "Disseminated Sclerosis" OR MS OR (DE "AMYOTROPHIC lateral sclerosis") OR "amyotrophic lateral sclerosis" OR (DE "EPILEPSY") OR Epilepsy OR Epilepsies OR "Seizure Disorder*" OR "Awakening Epilepsy" OR "Cryptogenic Epileps*" OR Aura OR Auras OR (DE "TRAUMATIC epilepsy") OR "traumatic epilepsy" OR (DE "PERIPHERAL vascular diseases") OR "Peripheral Vascular Disease*" OR "Peripheral Arterial Disease*" OR "Peripheral Artery Disease*" OR "Peripheral Angiopath*" OR "Peripheral Arterial Disease*" OR "Peripheral Vascular Disease*" OR (DE "DIABETES") OR "Diabetes Mellitus" OR Diabetes OR (DE "BRAIN damage") OR "Brain damage" OR "Craniocerebral Trauma*" OR (DE "HEAD injuries") OR "Head Injur*" OR "Craniocerebral Injur*" OR "Head Trauma*" OR "Minor Head Injur*" OR "Multiple Head Injur*" OR "Open Head injur*" OR "Superficial Head Injur*" OR "Occipital Trauma*" OR "Frontal Region Trauma*" OR "Forehead Trauma" OR (DE "SPINE") OR Spine OR "Vertebral Column*" OR "Spinal Column*" OR (DE "VERTEBRAE") OR Vertebra OR Vertebrae OR (DE "SPINAL cord") OR "Spinal Cord*" OR "Medulla Spinalis" OR Myelon OR Myelons OR "Coccygeal Cord" OR "Conus Medullari*" OR "Conus Terminalis" OR "Thoracic Cord*" OR "Lumbar Cord*" OR "Sacral Cord*" OR (DE "ARTIFICIAL implants") OR "Prosthes* and Implant*" OR "Implant* and Prothes*" OR "Prosthetic Implant*" OR "artificial implant*" OR Endoprosthesis OR Endoprostheses OR Prostheses OR Prosthesis OR "Artificial Implant*" ) </p> <p> Limiters - Published Date: 20000101-20221231; English </p> |
|-------------------------------------------------------------------------------------------------------------------------------------------------------------------------------------------------------------------------------------------------------------------------------------------------------------------------------------------------------------------------------------------------------------------------------------------------------------------------------------------------------------------------------------------------------------------------------------------------------------------------------------------------------------------------------------------------------------------------------------------------------------------------------------------------------------------------------------------------------------------------------------------------------------------------------------------------------------------------------------------------------------------------------------------------------------------------------------------------------------------------------------------------------------------------------------------------------------------------------------------------------------------------------------------------------------------------------------------------------------------------------------------------------------------------------------------------------------------------------------------------------------------------------------------------------------------------------------------------------------------------------------------------------------------------------------------------------------------------------------------------------------------------------------------------------------------------------------------------------------------------------------------------------------------------------------------------------------------------------------------------------------------------------------------------------------------------------------------------------------------------------------------------------------------------------------------------------------------------------------------------------------------------------------------------------------------------------------------------------------------------------------------------------------------------------------------------------------------------------------------------------------------------------------------------------------------------------------------------------------------------------------------------------------------------------------------------------------------------------------------------------------------------------------------------------------------------------------------------------------------------------------------------------------------------------------------------------------------------------------------------------------------------------------------------------------------------------------------------------------------------------------------------------------------------------------------------------------------------------------------------------------------------------------------------------------------------------------------------------------------------------------------------------------------------------------------------------------------------------------------------------------------------------------------------------------------------------------------------------------------------------------------------------------------------------------------------------------------------------------------------------------------------------------------------------------|
