# Supplementary material
Source: HighWire-hosted journal article supplement (https://bmjopensem.bmj.com/content/9/4/e001605)
Supplement: inline-supplementary-material-2 [file inline-supplementary-material-2.pdf]

**Appendix 2.** General study characteristics of the 20 studies included in the scoping review.

| Study         | Study Design          | Country of Origin        | Aim of Study                                                                                                                                                                                                                                 | Method of Testing | Participants (n)                                                                                                      | Age (mean $\pm$ SD)                                                                                                                                                                      | Sex/Gender (n)                               | Sport                                                               | Activity Level/Competition                                                                                                                                                                                                                                       |
|---------------|-----------------------|--------------------------|----------------------------------------------------------------------------------------------------------------------------------------------------------------------------------------------------------------------------------------------|-------------------|-----------------------------------------------------------------------------------------------------------------------|------------------------------------------------------------------------------------------------------------------------------------------------------------------------------------------|----------------------------------------------|---------------------------------------------------------------------|------------------------------------------------------------------------------------------------------------------------------------------------------------------------------------------------------------------------------------------------------------------|
| Andreoli 2012 | Retrospective Study   | International (Multiple) | To determine effect of prior youth sport participation on BMD/BMC and body composition in women compared with sedentary controls, and to evaluate if the positive effects of past sports participation persisted during menopause and aging. | In-Person Testing | Running FA: n = 12, Swimming FA: n = 12, Controls: n = 24                                                             | Running FA: 57.8 $\pm$ 6.4 years, Swimming FA: 58.4 $\pm$ 8.8 years, Controls: 60.8 $\pm$ 6.7 years                                                                                      | FA: n = 24 females, Controls: n = 24 females | FA: running and swimming, Controls: none                            | FA: exercised regularly for $\geq$ 3 hours/day, 4 days/week and competed at national and international levels, Controls: participated in activities 1-2x/month, but not in a competitive sport environment, overall physical activity never exceeded 1 hour/week |
| Arliani 2014  | Cross sectional study | Brazil                   | To compare prevalence of OA in former professional soccer players and non-professional athlete participants.                                                                                                                                 | In-Person Testing | FA: n = 27, Controls: n = 30                                                                                          | FA: 45.67 $\pm$ 5.91 years, Controls: 43.7 $\pm$ 6.15 years                                                                                                                              | FA: n = 27 males, Controls: n = 30 males     | FA: soccer, Controls: played soccer and other sports recreationally | FA: professional first division for at least 5 years, Controls: volunteers from different non-sports professional areas                                                                                                                                          |
| Babaei 2014   | Cross sectional study | Iran                     | To evaluate the basal BDNF level and memory performance, and reaction of BDNF regulation system to acute aerobic and anaerobic training in athletes and sedentary groups.                                                                    | In-Person Testing | FA Aerobic Group: n = 10, FA Anaerobic Group: n = 9, Controls Aerobic Group: n = 10, Controls Anaerobic Group: n = 10 | FA Aerobic Group: 51.40 $\pm$ 3.40 years<br>FA Anaerobic Group: 51.33 $\pm$ 4.18 years, Controls Aerobic Group: 53.70 $\pm$ 6.11 years, Controls Anaerobic Group: 52.60 $\pm$ 5.14 years | Not stated                                   | FA: soccer, Controls: none                                          | FA: elite regular training 3x/week, competed at domestic soccer championships for at least 10 years, Controls: no regular physical activity                                                                                                                      |

| Study        | Study Design          | Country of Origin | Aim of Study                                                                                                                             | Method of Testing | Participants (n)                                           | Age (mean $\pm$ SD)                                                                                                                                                                                                                                                                                                                                                                   | Sex/Gender (n)                                                                                                                                                         | Sport                                                                                                                                                                                                                                | Activity Level/Competition                                                                                                                                                                                                                                                                                                |
|--------------|-----------------------|-------------------|------------------------------------------------------------------------------------------------------------------------------------------|-------------------|------------------------------------------------------------|---------------------------------------------------------------------------------------------------------------------------------------------------------------------------------------------------------------------------------------------------------------------------------------------------------------------------------------------------------------------------------------|------------------------------------------------------------------------------------------------------------------------------------------------------------------------|--------------------------------------------------------------------------------------------------------------------------------------------------------------------------------------------------------------------------------------|---------------------------------------------------------------------------------------------------------------------------------------------------------------------------------------------------------------------------------------------------------------------------------------------------------------------------|
| Batista 2013 | Cross sectional study | Portugal          | To investigate whether former athletes protected against metabolic syndrome and if this is dependent on sex, career, or later lifestyle. | In-Person Testing | Elite FA: n = 225, Non-Elite FA: n = 168, Controls: n = 98 | Total Elite FA: 48.3 $\pm$ 12.5 years, Total Non-Elite FA: 50.6 $\pm$ 16.3 years, Total Controls: 51.5 $\pm$ 18.1 years<br><br>Male Elite FA: 49.8 $\pm$ 12.5 years, Male Non-Elite FA: 49.3 $\pm$ 15.5 years, Male Controls: 51.9 $\pm$ 18.3 years<br><br>Female Elite FA: 46.6 $\pm$ 12.4 years, Female Non-Elite FA: 52.4 $\pm$ 17.4 years, Female Controls: 51.1 $\pm$ 18.0 years | Total FA: n = 267 males, n = 224 females, Elite FA: n = 117 males, n = 108 females, Non-Elite FA: n = 99 males, n = 69 females, Controls: n = 49 males, n = 49 females | FA: Judo, canoeing, rowing, sprinting, middle- and long-distance running, archery, triathlon, decathlon, swimming, basketball, handball, soccer, volleyball, gymnastics, field events (throwing and jumping), Controls: Non-athletes | Elite FA: represented Portugal between 1969-2005 at least once in the Olympic Games, World/European championships, or other international competitions, Non-Elite FA: competed at least for 3 consecutive years in their adult life, but never represented Portugal, Controls: randomly selected in Portuguese population |
| Batista 2014 | Cross sectional study | Portugal          | To examine whether the development of behavioral and biological risk factors of elite FA, differed from non-elite FA and non-athletes.   | In-Person Testing | Elite FA: n = 225, Non-Elite FA: n = 168, Controls: n = 98 | Total Elite FA: 48.3 $\pm$ 12.5 years, Total Non-Elite FA: 50.6 $\pm$ 16.3 years, Total Controls: 51.5 $\pm$ 18.1 years<br><br>Male Elite FA: 49.8 $\pm$ 12.5 years, Male Non-Elite FA: 49.3 $\pm$ 15.5 years, Male Controls: 51.9 $\pm$ 18.3 years<br><br>Female Elite FA: 46.6 $\pm$ 12.4 years, Female Non-Elite FA: 52.4 $\pm$ 17.4 years, Female Controls: 51.1 $\pm$ 18.0 years | Total: n = 267 males, n = 224 females                                                                                                                                  | FA: Judo, canoeing, rowing, sprinting, middle- and long-distance running, archery, triathlon, decathlon, swimming, basketball, handball, soccer, volleyball, gymnastics, field events (throwing and jumping), Controls: Non-athletes | Elite FA: represented Portugal at least once in the Olympic Games, World/European championships, or other international competitions, Non-Elite FA: competed in selected sports but at no time represented Portugal, Controls: randomly selected from the national phonebook contacts                                     |

| Study        | Study Design          | Country of Origin | Aim of Study                                                                                                                                                                                                       | Method of Testing | Participants (n)                                                                 | Age (mean $\pm$ SD)                                                                                                                    | Sex/Gender (n)                                                                                           | Sport                                                              | Activity Level/Competition                                                                                                                                                                                                                                                                                                                                                                                                                             |
|--------------|-----------------------|-------------------|--------------------------------------------------------------------------------------------------------------------------------------------------------------------------------------------------------------------|-------------------|----------------------------------------------------------------------------------|----------------------------------------------------------------------------------------------------------------------------------------|----------------------------------------------------------------------------------------------------------|--------------------------------------------------------------------|--------------------------------------------------------------------------------------------------------------------------------------------------------------------------------------------------------------------------------------------------------------------------------------------------------------------------------------------------------------------------------------------------------------------------------------------------------|
| Chang 2009   | Cross sectional study | United States     | To compare CV risk factors and coronary atherosclerosis in retired NFL players to those in community controls.                                                                                                     | In-Person Testing | DHS FA: n = 150, ACLS FA: n = 200, DHS Controls: n = 150, ACLS Controls: n = 400 | DHS FA: 51.2 $\pm$ 9.7 years, ACLS FA: 55.2 $\pm$ 11.9 years, DHS Controls: 51.1 $\pm$ 9.5 years, ACLS Controls: 52.5 $\pm$ 11.9 years | DHS FA: n = 150 males, ACLS FA: n = 200 males, DHS Controls: n = 150 males, ACLS Controls: n = 400 males | FA: American professional football, Controls: none                 | FA: competed in National Football League (NFL) with 21.8 $\pm$ 10.1 years since retirement, Controls: not specified, individuals from national studies                                                                                                                                                                                                                                                                                                 |
| Dey 2002     | Cross sectional study | India             | To evaluate the effects of present-day total physical activity on selected CAD risk factors including obesity, lipids and blood pressure of older former athletes and their comparison with sedentary non-athletes | In-Person Testing | PAFA: n = 52, SFA: n = 54, Controls: n = 56                                      | PAFA: 45.9 $\pm$ 4.75 years, SFA: 42.7 $\pm$ 4.67 years, Controls: 46.07 $\pm$ 5.26 years                                              | FA: n = 106 males, Controls: n = 56 males                                                                | FA: soccer, Controls: none                                         | PAFA: 12-15 year career at state, national, and international competitions, after retirement engaged in coaching capacity, individual physical training/sports for at least 1-2 hour/day, 4-5 days/week; SFA: 12-15 year career, after retirement engaged in government or private sector jobs with sedentary lifestyle, Controls: no past athletic training, except occasional recreational sports, and currently with a sedentary lifestyle and job. |
| Grashow 2022 | Cohort study          | United States     | To examine the relationships between age, health span and chronic illness among former professional American-style football players.                                                                               | Internet or Email | FA: n = 2684, NHANES Controls: 1481, NHIS Controls: 6298                         | FA: 43.9 $\pm$ 9.6 years, NHANES Controls: 42.3 $\pm$ 10.4 years, NHIS Controls: 43.1 $\pm$ 10.2 years                                 | FA: n = 2684 males, NHANES Controls: n = 1481 males, NHIS Controls: n = 6298 males                       | FA: American professional football, NHANES and NHIS Controls: none | FA: competed in National Football League (NFL) after 1960, NHANES and NHIS Controls: individuals from national surveys, activity level not specified                                                                                                                                                                                                                                                                                                   |

| Study         | Study Design          | Country of Origin | Aim of Study                                                                                                                                                                                                     | Method of Testing                         | Participants (n)                                                                                                                            | Age (mean $\pm$ SD)                                                                                                                                                                                                         | Sex/Gender (n)                               | Sport                                                                                                                                                                                                                                                                                     | Activity Level/Competition                                                                                                                                                                                               |
|---------------|-----------------------|-------------------|------------------------------------------------------------------------------------------------------------------------------------------------------------------------------------------------------------------|-------------------------------------------|---------------------------------------------------------------------------------------------------------------------------------------------|-----------------------------------------------------------------------------------------------------------------------------------------------------------------------------------------------------------------------------|----------------------------------------------|-------------------------------------------------------------------------------------------------------------------------------------------------------------------------------------------------------------------------------------------------------------------------------------------|--------------------------------------------------------------------------------------------------------------------------------------------------------------------------------------------------------------------------|
| Hagmar 2006   | Cross sectional study | Sweden            | To characterize endothelial function in post-menopausal elite FA compared with sedentary controls; to study the influence of hormone replacement therapy (HRT) on endothelial function in these groups of women. | In-Person Testing                         | FA: n = 20, Controls: n = 19                                                                                                                | FA: 56 $\pm$ 3.5 years, Controls: 56.8 $\pm$ 3.4 years                                                                                                                                                                      | FA: n = 20 females, Controls: n = 19 females | FA: running, swimming, cross-country skiing, and downhill skiing, Controls: none                                                                                                                                                                                                          | FA: performed aerobic training for 8 hours each week, competed in international competitions, world record-holder, and the Olympics, Controls: $\leq$ 2 hours of recreational, low-intensity physical activity each week |
| Hurst 2010    | Cross sectional study | United States     | To evaluate subclinical atherosclerosis in retired professional football players                                                                                                                                 | Database extraction and in-person testing | FA: n = 201, Controls: n = 123                                                                                                              | FA: 50.8 $\pm$ 9 years, Controls: 49.6 $\pm$ 7 years                                                                                                                                                                        | FA: n = 201 males, Controls: n = 123 males   | FA: American professional football, Controls: none                                                                                                                                                                                                                                        | FA: competed in National Football League (NFL), Controls: pulled from Mayo Clinic database                                                                                                                               |
| Kettunen 2001 | Cross sectional study | Finland           | To investigate the association between participation in sports during adolescence and adulthood and self-reported lower-limb pain and disability in older men.                                                   | Mail                                      | Endurance FA: n = 141, Track and Field FA: n = 230, Team Sport FA: n = 262, Power Sport FA: n = 301, Marksmen FA: n = 57, Controls: n = 577 | Endurance FA: 68.8 $\pm$ 9.4 years, Track and Field FA: 64.4 $\pm$ 9.3 years, Team Sport FA: 61.8 $\pm$ 8.3 years, Power Sport FA: 64.5 $\pm$ 8.3 years, Marksmen FA: 70.7 $\pm$ 10.8 years, Controls: 62.4 $\pm$ 8.1 years | FA: n = 991 males, Controls: n = 557 males   | FA: endurance (long-distance running, cross-country skiing), power sport (boxing, wrestling, weightlifting, throwing), track and field (jumping, sprinting, hurdle, middle-distance running, decathlon events), team sport (soccer, ice hockey, and basketball), marksmen, Controls: none | FA: competed at least once in Olympic Games, World or European Championships, or international competitions between 1920 and 1965, Controls: healthy at military induction physicals                                     |

| Study          | Study Design                                                        | Country of Origin | Aim of Study                                                                                                                                                                                                                                               | Method of Testing                                   | Participants (n)                                                                             | Age (mean $\pm$ SD)                                                                                                                                                                 | Sex/Gender (n)                              | Sport                                                                                                                                              | Activity Level/Competition                                                                                                                                                                                                        |
|----------------|---------------------------------------------------------------------|-------------------|------------------------------------------------------------------------------------------------------------------------------------------------------------------------------------------------------------------------------------------------------------|-----------------------------------------------------|----------------------------------------------------------------------------------------------|-------------------------------------------------------------------------------------------------------------------------------------------------------------------------------------|---------------------------------------------|----------------------------------------------------------------------------------------------------------------------------------------------------|-----------------------------------------------------------------------------------------------------------------------------------------------------------------------------------------------------------------------------------|
| Kettunen 2010  | Cross-sectional study with retrospective and prospective components | Finland           | To investigate whether athletic training and elite competition show a reduced risk for hip fracture during two decades of follow-up, and if a lifelong physically active lifestyle is reflected in femoral bone mineral density measured at older age.     | 1985 mail questionnaire, 1992 clinical examinations | Soccer FA: n = 31, Endurance Running FA: n = 28, Weightlifting FA: n = 28, Controls: n = 774 | Total FA: 56.8 $\pm$ 10 years, Soccer FA: 56.5 $\pm$ 5.7 years, Endurance Running FA: 59.7 $\pm$ 4.7 years, Weightlifting FA: 59.2 $\pm$ 5.3 years, Controls: 55.2 $\pm$ 10.3 years | FA: n = 1271 males, Controls: n = 774 males | FA: Long-distance running, cross country skiing, soccer, ice hockey, basketball, track and field, boxing, wrestling, weightlifting, Controls: none | FA: competed at least once in Olympic Games, World or European Championships, or international competitions between 1920 and 1965, Controls: healthy at military induction physicals                                              |
| Majerczak 2019 | Cross sectional study                                               | Poland            | To assess the impact of long-lasting professional physical training performed when young on the endothelial function and arterial stiffness reported in older age in relation to glycocalyx injury, prostacyclin and nitric oxide production, inflammation | In-Person Testing                                   | Endurance FA: n = 16, Former Sprint FA: n = 15, Controls: n = 16                             | Endurance FA: 60.4 $\pm$ 8.2 years, Sprint FA: 59.1 $\pm$ 6.2 years, Controls: 60.6 $\pm$ 6.7 years                                                                                 | FA: n = 31 males, Controls: n = 16 males    | FA: sprint and endurance events, Controls: none                                                                                                    | FA: professional physical training and competed at a national and international level, including country championships, world championships, and the Olympics, Controls: untrained                                                |
| Pihl 2003      | Cross sectional study                                               | Estonia           | To analyze the status of oxidative stress, hsCRP level, and other CV risk factors in FA, and to the physical activity level following retirement.                                                                                                          | In-Person Testing                                   | PAFA: n = 29, SFA: n = 24, Controls: n = 25                                                  | PAFA: 47.5 $\pm$ 7.2 years, SFA: 48.6 $\pm$ 6.9 years, Controls: 47.7 $\pm$ 6.7 years                                                                                               | FA: n = 53 males, Controls: n = 25 males    | FA: endurance sports, Controls: no competitive sport history                                                                                       | PAFA: previous competition at international or national, currently exercising regularly $\geq$ 3x/week, SFA: previous competition at international or national, currently exercising <3x/week, Controls: fellow workers of the FA |

| Study        | Study Design              | Country of Origin | Aim of Study                                                                                                                                                                                                                              | Method of Testing | Participants (n)                                                                                                                                   | Age (mean $\pm$ SD)                                                                                                                                                                           | Sex/Gender (n)                                                                                                              | Sport                                                                                                                                                                      | Activity Level/Competition                                                                                                                                                                                          |
|--------------|---------------------------|-------------------|-------------------------------------------------------------------------------------------------------------------------------------------------------------------------------------------------------------------------------------------|-------------------|----------------------------------------------------------------------------------------------------------------------------------------------------|-----------------------------------------------------------------------------------------------------------------------------------------------------------------------------------------------|-----------------------------------------------------------------------------------------------------------------------------|----------------------------------------------------------------------------------------------------------------------------------------------------------------------------|---------------------------------------------------------------------------------------------------------------------------------------------------------------------------------------------------------------------|
| Raty 2002    | Cross sectional study     | Finland           | To compare elite male FA with community control subjects to evaluate the effects of recent physical activity and of lifetime participation in sports on dynamic balance                                                                   | In-Person Testing | Soccer FA: n = 28, Weightlifting FA: n = 24, Running FA: n = 26, Marksmen FA: n = 27, 47-year-old Controls: n = 212, 57 year old Controls: n = 197 | Soccer FA: 56.2 $\pm$ 5.6 years, Weightlifting FA: 59.0 $\pm$ 5.4 years, Running FA: 59.9 $\pm$ 4.6 years, Marksmen FA: 61.0 $\pm$ 4.4 years, Controls: stratified by ages 27, 37, 47, 57, 67 | FA: n = 105 males, Controls: n = 409 males                                                                                  | FA: Soccer, weightlifting, long-distance running, marksmen, Controls: none                                                                                                 | FA: represented Finland at least once in an international competition, Controls: light physical activity, drawn from the population register of the city of Turku, Finland                                          |
| Ravi 2020    | Retrospective descriptive | Finland           | To investigate the associations between competitive sport participation in adolescence and age at menarche with middle-aged; and if the lifetime occurrence of fractures, current musculoskeletal problems, and anorexia nervosa differed | In-Person Testing | Competitive FA: n = 136, Regular Physical Activity Controls: n = 689, No Exercise Controls: n = 163                                                | Competitive FA: 50.9 years [50.5-51.2], Regular Physical Activity Controls: 51.4 years [51.3-51.6], No Exercise Controls: 51.6 years [51.3-51.9]                                              | Competitive FA: n = 136 females, Regular Physical Activity Controls: n = 689 females, No Exercise Controls: n = 163 females | Competitive FA: track and field (28.7%), volleyball (20.6%), cross-country skiing (18.4%), running (16.9%), Finnish baseball (7.4%), and gymnastics (7.4%), Controls: none | Competitive FA: regular competitive sport and training at age 13-16, Regular Physical Activity Controls: regularly physically active from age of 13-16, No Exercise Controls: did not perform exercise at age 13-16 |
| Schmitt 2004 | Cross sectional study     | Germany           | To determine which symptomatic changes occur in the hip joints of elite javelin throwers and high jumpers after their retirement compared with matched controls                                                                           | In-Person Testing | Javelin Throwing FA: n = 19, High Jumping FA: n = 22, Controls: n = 41                                                                             | Javelin Throwing FA: 52 years [40-59], High Jumping FA: 47 years [42-57], Javelin Throwing Controls: 51 years [40-58], High Jump Controls: 48 years [40-58]                                   | FA: n = 41 males, Controls: n = 41 males                                                                                    | FA: Javelin throwing and high jump, Controls: not specified                                                                                                                | FA: Former Olympic and world champions, world record holders and national top athletes, Controls: sports activity $\leq$ 2x/week and no participation in competitions                                               |

| Study      | Study Design          | Country of Origin | Aim of Study                                                                                                                                       | Method of Testing | Participants (n)               | Age (mean $\pm$ SD)                                      | Sex/Gender (n)                                                   | Sport                                                                                                                                                                                                                                                                                                                                                                                                                                                                                                                               | Activity Level/Competition                                                                                                                                                                                                                                      |
|------------|-----------------------|-------------------|----------------------------------------------------------------------------------------------------------------------------------------------------|-------------------|--------------------------------|----------------------------------------------------------|------------------------------------------------------------------|-------------------------------------------------------------------------------------------------------------------------------------------------------------------------------------------------------------------------------------------------------------------------------------------------------------------------------------------------------------------------------------------------------------------------------------------------------------------------------------------------------------------------------------|-----------------------------------------------------------------------------------------------------------------------------------------------------------------------------------------------------------------------------------------------------------------|
| Simon 2017 | Cross sectional study | United States     | To evaluate differences in current physical fitness in former National Collegiate Athletic Association (NCAA) Division I athletes and nonathletes. | In-Person Testing | FA: n = 100, Controls: n = 100 | FA: 53.1 $\pm$ 7.4 years, Controls: 51.4 $\pm$ 7.3 years | FA: n = 60 men, n = 40 women, Controls: n = 60 men, n = 40 women | FA: Football n = 30, Diving n = 2, Basketball n = 8, Field Hockey n = 3, Wrestling n = 3, Gymnastics n = 6, Soccer n = 7, Volleyball n = 9, Cross Country n = 3, Softball n = 2, Baseball n = 3, Track and Field n = 9, Rifle n = 1, Rowing n = 1, Swimming n = 8, Tennis n = 5, Controls: Basketball n = 7, Field Hockey n = 4, Gymnastics n = 5, Soccer n = 8, Volleyball n = 6, Baseball n = 6, Swimming n = 10, Tennis n = 6, Ice Hockey n = 4, Competitive cycling n = 15, Physical Activity Regularly n = 24, Army ROTC n = 5 | FA: competed in NCAA Division I for 2-5 years, n = 30 professional level, Controls: were recreationally active but played intramural sports, played club sports, or participated in other recreational activity on a regular basis (3-5x/week) while in college |

| Study             | Study Design          | Country of Origin | Aim of Study                                                                                                                                                                         | Method of Testing | Participants (n)                            | Age (mean $\pm$ SD)                                                                                                                                                                                                                                                                                                                              | Sex/Gender (n)                                 | Sport                                                             | Activity Level/Competition                                                                                                                                                                                                                                                                                                                                   |
|-------------------|-----------------------|-------------------|--------------------------------------------------------------------------------------------------------------------------------------------------------------------------------------|-------------------|---------------------------------------------|--------------------------------------------------------------------------------------------------------------------------------------------------------------------------------------------------------------------------------------------------------------------------------------------------------------------------------------------------|------------------------------------------------|-------------------------------------------------------------------|--------------------------------------------------------------------------------------------------------------------------------------------------------------------------------------------------------------------------------------------------------------------------------------------------------------------------------------------------------------|
| Stracciolini 2020 | Cross sectional study | United States     | To investigate associations between sports participation by Division III collegiate female athletes and later life health outcomes and quality-of-life measures.                     | Internet or Email | FA: n = 697, Controls: n = 900              | FA <40 years: n = 190, Controls <40 years: n = 160, FA 40-44 years: n = 114, Controls 40-44 years: n = 129, FA 45-49 years: n = 152, Controls 45-49 years: n = 125, FA 50-54 years: n = 129, Controls 50-54 years: n = 206, Controls 55-59 years: n = 154, Controls 60-64 years: n = 70, Controls 65-70 years: n = 54, Controls >70 years: n = 2 | FA: n = 697 females, Controls: n = 900 females | FA: NCAA Division III sport (not specified), Controls: not stated | FA: NCAA Division III level, Controls: no college sport participation                                                                                                                                                                                                                                                                                        |
| Unt 2008          | Cross sectional study | Estonia           | To investigate the level of homocysteine (Hcy) and glutathione redox ratio in relation to physical activity and cardiorespiratory fitness in former top-level athletes and controls. | In-Person Testing | PAFA: n = 52, SFA: n = 25, Controls: n = 33 | PAFA: 44.7 $\pm$ 6.7 years, SFA: 49.4 $\pm$ 6.0 years, Controls: 48.4 $\pm$ 7.8 years                                                                                                                                                                                                                                                            | FA: n = 77 males, Controls: n = 33 males       | FA: endurance sports, Controls: none                              | PAFA: competed at international or national level at least 15 years ago, currently exercising regularly $\geq$ 3x/week, SFA: competed at international or national level at least 15 years ago, currently physically active $<$ 3x/week, Controls: currently physically inactive and no competitive sports history, mostly fellow workers of former athletes |
