# Supplementary material
Source: HighWire-hosted journal article supplement (https://bmjopensem.bmj.com/content/9/4/e001605)
Supplement: inline-supplementary-material-3 [file inline-supplementary-material-3.pdf]

**Appendix 3.** Self-reported functional measures.

| Study         | KOOS (median)                                                                                                                                                                                                                                                                                                                                                                                                          | Pain/Disability Prevalence (%)                                                                                                                                                                                                                                                                                                                                                                                                                                                                                                                                                                                                                                                                                                                                                                                                                                                                                                                                                                                                                                                                                                                                                                                                                                                                                                                                                                                                                                                                                                                                                                                                                                                                             | Other |
|---------------|------------------------------------------------------------------------------------------------------------------------------------------------------------------------------------------------------------------------------------------------------------------------------------------------------------------------------------------------------------------------------------------------------------------------|------------------------------------------------------------------------------------------------------------------------------------------------------------------------------------------------------------------------------------------------------------------------------------------------------------------------------------------------------------------------------------------------------------------------------------------------------------------------------------------------------------------------------------------------------------------------------------------------------------------------------------------------------------------------------------------------------------------------------------------------------------------------------------------------------------------------------------------------------------------------------------------------------------------------------------------------------------------------------------------------------------------------------------------------------------------------------------------------------------------------------------------------------------------------------------------------------------------------------------------------------------------------------------------------------------------------------------------------------------------------------------------------------------------------------------------------------------------------------------------------------------------------------------------------------------------------------------------------------------------------------------------------------------------------------------------------------------|-------|
| Arliani 2014  | Pain Subscale: Former Athletes = 88.9, Controls = 94.4, p = 0.005, Symptom Subscale: Former Athletes = 85.71, Controls = 94.64, p = 0.002, Function in Daily Living Subscale: Former Athletes = 97.06, Controls = 100, p = 0.060, Function in Sport and Recreation Subscale: Former Athletes = 85, Controls = 100, p = 0.193, Knee Related Quality of Life Subscale: Former Athletes = 75, Controls = 93.75, p = 0.027 |                                                                                                                                                                                                                                                                                                                                                                                                                                                                                                                                                                                                                                                                                                                                                                                                                                                                                                                                                                                                                                                                                                                                                                                                                                                                                                                                                                                                                                                                                                                                                                                                                                                                                                            |       |
| Kettunen 2001 |                                                                                                                                                                                                                                                                                                                                                                                                                        | <p>Hip Disability: Former Endurance Athletes = 9/116 (7.8%), p = 0.02, Former Track and Field Athletes = 5/203 (2.5%), p &lt; 0.01, Former Team Sport Athletes = 16/236 (6.8%), p = 0.09, Former Power Sport Athletes = 35/363 (13.3%), p = 0.49, Former Marksmen Athletes = 4/51 (7.8%), p = 0.11, Total Former Athletes = 69/869 (7.9%), p &lt; 0.01, Controls = 68/489 (13.9%), all p values compared with controls</p> <p>Knee Disability: Former Endurance Athletes = 9/109 (8.3%), p = 0.42, Former Track and Field Athletes = 15/197 (7.6%), p = 0.93, Former Team Sport Athletes = 36/211 (17.1%), p = 0.04, Former Power Sport Athletes = 43/249 (17.3%), p = 0.38, Former Marksmen Athletes = 6/50 (12.0%), p = 0.75, Total Former Athletes = 109/816 (13.4%), p = 0.35, Controls = 59/460 (12.8%), all p values compared with controls</p> <p>Hip Pain: Former Endurance Athletes = 16/125 (12.8%), p &lt; 0.01, Former Track and Field Athletes = 39/246 (15.9%), p = 0.13, Former Team Sport Athletes = 39/246 (15.9%), p = 0.11, Former Power Sport Athletes = 64/266 (24.1%), p = 0.39, Former Marksmen Athletes = 9/54 (16.7%), p = 0.03, Total Former Athletes = 163/915 (17.8%), p = 0.01, Controls = 128/527 (24.3%), all p values compared with controls</p> <p>Knee Pain: Former Endurance Athletes = 29/133 (21.8%), p = 0.31, Former Track and Field Athletes = 52/220 (23.6%), p = 0.70, Former Team Sport Athletes = 81/251 (32.3%), p = 0.02, Former Power Sport Athletes = 81/272 (29.8%), p = 0.76, Former Marksmen Athletes = 12/57 (21.1%), p = 0.38, Total Former Athletes = 255/933 (27.3%), p = 0.69, Controls = 146/532 (27.5%), all p values compared with controls</p> |       |

| Study           | KOOS (median) | Pain/Disability Prevalence (%)                                                                                                                                                                                                                                                                                                                                                                                                                                                                                                                                                                                                                               | Other                                                                                                                                                                                                                                                                                                                                                                                                                                                                                                     |
|-----------------|---------------|--------------------------------------------------------------------------------------------------------------------------------------------------------------------------------------------------------------------------------------------------------------------------------------------------------------------------------------------------------------------------------------------------------------------------------------------------------------------------------------------------------------------------------------------------------------------------------------------------------------------------------------------------------------|-----------------------------------------------------------------------------------------------------------------------------------------------------------------------------------------------------------------------------------------------------------------------------------------------------------------------------------------------------------------------------------------------------------------------------------------------------------------------------------------------------------|
| Raty<br>2002    |               | <p>Hip Pain: Former Soccer Athletes = 14%, Former Weightlifting Athletes = 8%, Former Running Athletes = 19%, Former Marksmen Athletes = 19%, 47-year-old Controls = 16%, 57-year-old Controls = 25%, p = 0.69</p> <p>Knee Pain: Former Soccer Athletes = 57%, Former Weightlifting Athletes = 42%, Former Running Athletes = 46%, Former Marksmen Athletes = 26%, 47-year-old Controls = 33%, 57-year-old Controls = 42%, p = 0.13</p> <p>Back Pain: Former Soccer Athletes = 61%, Former Weightlifting Athletes = 63%, Former Running Athletes = 54%, Former Marksmen Athletes = 37%, 47-year-old Controls = 58%, 57-year-old Controls = 66%, p = 0.18</p> |                                                                                                                                                                                                                                                                                                                                                                                                                                                                                                           |
| Schmitt<br>2004 |               |                                                                                                                                                                                                                                                                                                                                                                                                                                                                                                                                                                                                                                                              | Hanover Functional Ability Questionnaire Functional Capacity (mean): Former Javelin Throwing Athletes = 96%, Former High Jumping Athletes = 99%, p value not stated                                                                                                                                                                                                                                                                                                                                       |
| Simon<br>2017   |               |                                                                                                                                                                                                                                                                                                                                                                                                                                                                                                                                                                                                                                                              | <p>Time Loss Injury: Former Athletes = 78-yes, 12-no, Controls = 20-yes, 80-no</p> <p>Chronic Injury during College: Former Athletes = 60-yes, 40-no, Controls = 18-yes, 82-no</p> <p>Currently Limited during ADLs: Former Athletes = 21-yes, 79-no, Controls = 0-yes, 100-no</p> <p>Currently Limited during Sport or Recreation: Former Athletes = 57-yes, 43-no, Controls = 6-yes, 94-no</p> <p>Diagnosed with OA: Former Athletes = 43-yes, 57-no, Controls = 10-yes, 90-no, p values not stated</p> |
