# Supplementary material
Source: HighWire-hosted journal article supplement (https://bmjopensem.bmj.com/content/9/4/e001605)
Supplement: inline-supplementary-material-4 [file inline-supplementary-material-4.pdf]

**Appendix 4.** Anthropometrics, body composition, and bone density measures.

| Study         | Body Weight / Anthropometrics (mean $\pm$ SD)                                                                                                                                                                                                                                                                                                                                                                                                                                                 | Body Composition (mean $\pm$ SD)                                                                                                                                                                                                                                                                                                                                                                                                                                                                                                                                                                                                                                                                                                                                                                                                                                                                                                                                                                                                                                                                                                                                                                                                                                                                                                                                                                                                                                                                                                                                                                                                                                                                                                                                            | Bone Density (mean $\pm$ SD)                                                                                                                                                                                                                                                                                                                                                                                                                                                                                                                                                                                                                                                                                                                                                                                                                                                                                                                                                                                                                                                                                                                                                                                                                                                                                                                                                                                                                                                                                                                                                                                                                                                                                                                                                                                                                                                                                                                                                                                                                                                                                                                                                                                                        |
|---------------|-----------------------------------------------------------------------------------------------------------------------------------------------------------------------------------------------------------------------------------------------------------------------------------------------------------------------------------------------------------------------------------------------------------------------------------------------------------------------------------------------|-----------------------------------------------------------------------------------------------------------------------------------------------------------------------------------------------------------------------------------------------------------------------------------------------------------------------------------------------------------------------------------------------------------------------------------------------------------------------------------------------------------------------------------------------------------------------------------------------------------------------------------------------------------------------------------------------------------------------------------------------------------------------------------------------------------------------------------------------------------------------------------------------------------------------------------------------------------------------------------------------------------------------------------------------------------------------------------------------------------------------------------------------------------------------------------------------------------------------------------------------------------------------------------------------------------------------------------------------------------------------------------------------------------------------------------------------------------------------------------------------------------------------------------------------------------------------------------------------------------------------------------------------------------------------------------------------------------------------------------------------------------------------------|-------------------------------------------------------------------------------------------------------------------------------------------------------------------------------------------------------------------------------------------------------------------------------------------------------------------------------------------------------------------------------------------------------------------------------------------------------------------------------------------------------------------------------------------------------------------------------------------------------------------------------------------------------------------------------------------------------------------------------------------------------------------------------------------------------------------------------------------------------------------------------------------------------------------------------------------------------------------------------------------------------------------------------------------------------------------------------------------------------------------------------------------------------------------------------------------------------------------------------------------------------------------------------------------------------------------------------------------------------------------------------------------------------------------------------------------------------------------------------------------------------------------------------------------------------------------------------------------------------------------------------------------------------------------------------------------------------------------------------------------------------------------------------------------------------------------------------------------------------------------------------------------------------------------------------------------------------------------------------------------------------------------------------------------------------------------------------------------------------------------------------------------------------------------------------------------------------------------------------------|
| Andreoli 2012 | <p>Height: Running FA = 162.9 <math>\pm</math> 5.6 cm, Swimming FA = 167.8 <math>\pm</math> 6.5 cm, Controls = 157.2 <math>\pm</math> 7.5 cm, p value not stated</p> <p>Weight: Running FA = 60.2 <math>\pm</math> 7.9 kg, Swimming FA = 67.8 <math>\pm</math> 12.6 kg, Controls = 62.6 <math>\pm</math> 6.4 kg, p value not stated</p> <p>BMI: Running FA = 22.6 <math>\pm</math> 2.5, Swimming FA = 23.9 <math>\pm</math> 3.2, Controls = 25.3 <math>\pm</math> 1.7, p value not stated</p> | <p>Lean Body Mass: Running FA = 42.8 <math>\pm</math> 3.9 kg, Swimming FA = 46.1 <math>\pm</math> 5.6 kg, Controls = 37.9 <math>\pm</math> 3.7 kg, p &lt; 0.001</p> <p>Fat Mass: Running FA = 15.6 <math>\pm</math> 4.3 kg, Swimming FA = 19.8 <math>\pm</math> 8.1 kg, Controls = 23.4 <math>\pm</math> 4.3 kg, p &lt; 0.001</p> <p>Percent Body Fat: Running FA = 25.4 <math>\pm</math> 4.2%, Swimming FA = 28.3 <math>\pm</math> 6.7%, Controls = 37.0 <math>\pm</math> 4.6%, p &lt; 0.001</p> <p>Left Arm Fat Mass: Running FA = 1.0 <math>\pm</math> 0.3 kg, Swimming FA = 1.5 <math>\pm</math> 0.7 kg, Controls = 1.9 <math>\pm</math> 0.4 kg, runners compared with controls p &lt; 0.001, swimmers compared with controls p &lt; 0.01</p> <p>Right Arm Fat Mass: Running FA = 1.1 <math>\pm</math> 0.3 kg, Swimming FA = 1.6 <math>\pm</math> 0.6 kg, Controls = 2.0 <math>\pm</math> 0.5 kg, runners compared with controls p &lt; 0.001, swimmers compared with controls p &lt; 0.01</p> <p>Trunk Fat Mass: Running FA = 7.1 <math>\pm</math> 1.9 kg, Swimming FA = 8.1 <math>\pm</math> 4.7 kg, Controls = 10.5 <math>\pm</math> 2.3 kg, p &lt; 0.001</p> <p>Left Leg Fat Mass: Running FA = 3.1 <math>\pm</math> 0.9 kg, Swimming FA = 3.7 <math>\pm</math> 1.1 kg, Controls = 3.9 <math>\pm</math> 0.9 kg, p value not stated</p> <p>Right Leg Fat Mass: Running FA = 3.1 <math>\pm</math> 1.0 kg, Swimming FA = 3.8 <math>\pm</math> 1.1 kg, Controls = 3.9 <math>\pm</math> 1.2 kg, p value not stated</p> <p>Left Arm Lean Mass: Running FA = 2.2 <math>\pm</math> 0.2 kg, Swimming FA = 2.8 <math>\pm</math> 0.3 kg, Controls = 2.0 <math>\pm</math> 0.2 kg, swimmers compared with controls p &lt; 0.001, swimmers compared with runners p &lt; 0.001</p> | <p>Left Arm BMD: Running FA = 0.692 <math>\pm</math> 0.074 g/cm<sup>2</sup>, Swimming FA = 0.703 <math>\pm</math> 0.057 g/cm<sup>2</sup>, Controls = 0.640 <math>\pm</math> 0.080 g/cm<sup>2</sup>, p value not stated</p> <p>Right Arm BMD: Running FA = 0.716 <math>\pm</math> 0.088 g/cm<sup>2</sup>, Swimming FA = 0.710 <math>\pm</math> 0.063 g/cm<sup>2</sup>, Controls = 0.647 <math>\pm</math> 0.068 g/cm<sup>2</sup>, p value not stated</p> <p>Thoracic Spine BMD: Running FA = 0.795 <math>\pm</math> 0.100 g/cm<sup>2</sup>, Swimming FA = 0.774 <math>\pm</math> 0.081 g/cm<sup>2</sup>, Controls = 0.694 <math>\pm</math> 0.140 g/cm<sup>2</sup>, runners compared with controls p &lt; 0.01</p> <p>Lumbar Spine BMD: Running FA = 1.162 <math>\pm</math> 0.198 g/cm<sup>2</sup>, Swimming FA = 1.051 <math>\pm</math> 0.126 g/cm<sup>2</sup>, Controls = 0.938 <math>\pm</math> 0.164 g/cm<sup>2</sup>, runners compared with controls p &lt; 0.01</p> <p>Left Leg BMD: Running FA = 1.130 <math>\pm</math> 0.144 g/cm<sup>2</sup>, Swimming FA = 1.043 <math>\pm</math> 0.099 g/cm<sup>2</sup>, Controls = 0.921 <math>\pm</math> 0.107 g/cm<sup>2</sup>, runners compared with controls p &lt; 0.001, swimmers compared with controls p &lt; 0.01</p> <p>Right Leg BMD: Running FA = 1.115 <math>\pm</math> 0.138 g/cm<sup>2</sup>, Swimming FA = 1.062 <math>\pm</math> 0.090 g/cm<sup>2</sup>, Controls = 0.942 <math>\pm</math> 0.112 g/cm<sup>2</sup>, runners compared with controls p &lt; 0.001, swimmers compared with controls p &lt; 0.01</p> <p>Left Arm BMC: Running FA = 134.9 <math>\pm</math> 21.5 g, Swimming FA = 155.6 <math>\pm</math> 24.3 g, Controls = 121.8 <math>\pm</math> 23.5 g, swimmers compared with controls p &lt; 0.001</p> <p>Right Arm BMC: Running FA = 146.8 <math>\pm</math> 28.2 g, Swimming FA = 155.5 <math>\pm</math> 27.3 g, Controls = 128.3 <math>\pm</math> 23.7 g, swimmers compared with controls p &lt; 0.001</p> <p>Trunk BMC: Running FA = 497.3 <math>\pm</math> 83.5 g, Swimming FA = 493.6 <math>\pm</math> 71.3 g, Controls = 400.7 <math>\pm</math> 74.6 g, runners compared with controls p &lt; 0.001, swimmers compared with controls p &lt; 0.001</p> |

| Study                       | Body Weight / Anthropometrics (mean $\pm$ SD)                                                                                                                                                                                                                                                                                                                                                                                                                                                                                                                                                                                                                                                                                                                                                                                                                                                                                                        | Body Composition (mean $\pm$ SD)                                                                                                                                                                                                                                                                                                                                                                                                                                                                                                                                                                                                                                                                                                                                                                                                                                                                                                                                                                                | Bone Density (mean $\pm$ SD)                                                                                                                                                                                                                                                                                                                                                                                                                                                                                                                             |
|-----------------------------|------------------------------------------------------------------------------------------------------------------------------------------------------------------------------------------------------------------------------------------------------------------------------------------------------------------------------------------------------------------------------------------------------------------------------------------------------------------------------------------------------------------------------------------------------------------------------------------------------------------------------------------------------------------------------------------------------------------------------------------------------------------------------------------------------------------------------------------------------------------------------------------------------------------------------------------------------|-----------------------------------------------------------------------------------------------------------------------------------------------------------------------------------------------------------------------------------------------------------------------------------------------------------------------------------------------------------------------------------------------------------------------------------------------------------------------------------------------------------------------------------------------------------------------------------------------------------------------------------------------------------------------------------------------------------------------------------------------------------------------------------------------------------------------------------------------------------------------------------------------------------------------------------------------------------------------------------------------------------------|----------------------------------------------------------------------------------------------------------------------------------------------------------------------------------------------------------------------------------------------------------------------------------------------------------------------------------------------------------------------------------------------------------------------------------------------------------------------------------------------------------------------------------------------------------|
| Andreoli<br>2012<br>(cont.) |                                                                                                                                                                                                                                                                                                                                                                                                                                                                                                                                                                                                                                                                                                                                                                                                                                                                                                                                                      | <p>Right Arm Lean Mass: Running FA = <math>2.4 \pm 0.2</math> kg, Swimming FA = <math>2.9 \pm 0.4</math> kg, Controls = <math>2.1 \pm 0.4</math> kg, swimmers compared with controls <math>p &lt; 0.001</math>, swimmers compared with runners <math>p &lt; 0.01</math></p> <p>Trunk Lean Mass: Running FA = <math>19.1 \pm 0.5</math> kg, Swimming FA = <math>22.4 \pm 3.2</math> kg, Controls = <math>18.6 \pm 1.9</math> kg, p value not stated</p> <p>Left Leg Lean Mass: Running FA = <math>6.8 \pm 0.8</math> kg, Swimming FA = <math>7.1 \pm 0.9</math> kg, Controls = <math>5.7 \pm 0.6</math> kg, runners compared with controls <math>p &lt; 0.001</math>, swimmers compared with controls <math>p &lt; 0.001</math></p> <p>Right Leg Lean Mass: Running FA = <math>6.9 \pm 0.7</math> kg, Swimming FA = <math>7.4 \pm 1.0</math> kg, Controls = <math>6.0 \pm 0.7</math> kg, runners compared with controls <math>p &lt; 0.001</math>, swimmers compared with controls <math>p &lt; 0.001</math></p> | <p>Left Leg BMC: Running FA = <math>372.8 \pm 77.0</math> g, Swimming FA = <math>360.8 \pm 50.5</math> g, Controls = <math>272.7 \pm 52.3</math> g, runners compared with controls <math>p &lt; 0.001</math>, swimmers compared with controls <math>p &lt; 0.001</math></p> <p>Right Leg BMC: Running FA = <math>389.6 \pm 76.5</math> g, Swimming FA = <math>382.9 \pm 56.7</math> g, Controls = <math>289.6 \pm 50.5</math> g, runners compared with controls <math>p &lt; 0.001</math>, swimmers compared with controls <math>p &lt; 0.001</math></p> |
| Arliani<br>2014             | BMI: FA = $25.73 \pm 3.15$ , Controls = $28.35 \pm 3.66$ , $p = 0.006$                                                                                                                                                                                                                                                                                                                                                                                                                                                                                                                                                                                                                                                                                                                                                                                                                                                                               |                                                                                                                                                                                                                                                                                                                                                                                                                                                                                                                                                                                                                                                                                                                                                                                                                                                                                                                                                                                                                 |                                                                                                                                                                                                                                                                                                                                                                                                                                                                                                                                                          |
| Babaei<br>2014              | <p>Weight: FA Aerobic Group = <math>80 \pm 7.8</math> kg, FA Anaerobic Group = <math>73.83 \pm 8.58</math> kg, Controls Aerobic Group = <math>73.83 \pm 8.58</math> kg, Controls Anaerobic Group = <math>77.21 \pm 7.17</math> kg, aerobic groups <math>p = 0.7</math>, anaerobic groups <math>p = 0.35</math></p> <p>Height: FA Aerobic Group = <math>177.6 \pm 8.26</math> cm, FA Anaerobic Group = <math>171.22 \pm 6.07</math> cm, Controls Aerobic Group = <math>173.47 \pm 5.31</math> cm, Controls Anaerobic Group = <math>175.47 \pm 4.15</math> cm, aerobic groups <math>p = 0.2</math>, anaerobic groups <math>p = 0.15</math></p> <p>BMI: FA Aerobic Group = <math>24.65 \pm 1.15</math>, FA Anaerobic Group = <math>24.60 \pm 1.5</math>, Controls Aerobic Group = <math>27.04 \pm 2.88</math>, Controls Anaerobic Group = <math>27.55 \pm 3.05</math>, aerobic groups <math>p = 0.03</math>, anaerobic groups <math>p = 0.02</math></p> |                                                                                                                                                                                                                                                                                                                                                                                                                                                                                                                                                                                                                                                                                                                                                                                                                                                                                                                                                                                                                 |                                                                                                                                                                                                                                                                                                                                                                                                                                                                                                                                                          |
| Batista<br>2013             | BMI: Elite FA = $24.7 \pm 0.2$ , Non-Elite FA = $26.1 \pm 0.3$ , Controls = $27.1 \pm 0.3$ , $p < 0.001$                                                                                                                                                                                                                                                                                                                                                                                                                                                                                                                                                                                                                                                                                                                                                                                                                                             | Waist Circumference: Elite FA = Men $97.6 \pm 0.9$ cm, Women $85.7 \pm 0.5$ cm, Non-Elite FA = Men $98.3 \pm 0.9$ cm, Women $90.6 \pm 0.6$ cm, Controls = Men $96.7 \pm 1.3$ cm, Women $93.0 \pm 0.8$ cm, men $p = 0.603$ , women $p < 0.001$                                                                                                                                                                                                                                                                                                                                                                                                                                                                                                                                                                                                                                                                                                                                                                   |                                                                                                                                                                                                                                                                                                                                                                                                                                                                                                                                                          |

| Study        | Body Weight / Anthropometrics (mean $\pm$ SD)                                                                                                                                                                                                                                                                                                                                                                                                                                                                                                                                                                                                                                                                                                                                                                                                                                          | Body Composition (mean $\pm$ SD)                                                                                                                                                                                                                                                                                                                                                                                                                                                                                                                                                                                                                                                                                                                                                                                                                                                                                             | Bone Density (mean $\pm$ SD) |
|--------------|----------------------------------------------------------------------------------------------------------------------------------------------------------------------------------------------------------------------------------------------------------------------------------------------------------------------------------------------------------------------------------------------------------------------------------------------------------------------------------------------------------------------------------------------------------------------------------------------------------------------------------------------------------------------------------------------------------------------------------------------------------------------------------------------------------------------------------------------------------------------------------------|------------------------------------------------------------------------------------------------------------------------------------------------------------------------------------------------------------------------------------------------------------------------------------------------------------------------------------------------------------------------------------------------------------------------------------------------------------------------------------------------------------------------------------------------------------------------------------------------------------------------------------------------------------------------------------------------------------------------------------------------------------------------------------------------------------------------------------------------------------------------------------------------------------------------------|------------------------------|
| Batista 2014 | <p>BMI: Elite FA = men <math>26.4 \pm 3.1</math>, women <math>22.7 \pm 1.9</math>, Non-Elite FA = men <math>26.5 \pm 3.7</math>, women <math>25.9 \pm 3.4</math>, Controls = men <math>26.5 \pm 3.6</math>, women <math>27.7 \pm 4.8</math>, men <math>p = 0.963</math>, women <math>p &lt; 0.001</math></p> <p>Overweight/Obesity (%): Elite FA = men 73%, women 20%, Non-Elite FA = men 64%, women 65%, Controls = men 69%, women 74%, men <math>p = 0.313</math>, women <math>p &lt; 0.001</math></p>                                                                                                                                                                                                                                                                                                                                                                               |                                                                                                                                                                                                                                                                                                                                                                                                                                                                                                                                                                                                                                                                                                                                                                                                                                                                                                                              |                              |
| Chang 2009   | <p>Weight: DHS FA = <math>111.3 \pm 18.4</math> kg, ACLS FA = <math>110.6 \pm 19.6</math> kg, DHS Controls = <math>96.3 \pm 14.5</math> kg, ACLS Controls = <math>94.6 \pm 14.7</math> kg, DHS and ACLS <math>p &lt; 0.001</math></p> <p>Height: DHS FA = <math>187.4 \pm 7.1</math> cm, ACLS FA = <math>186.2 \pm 6.9</math> cm, DHS Controls = <math>175.1 \pm 7.6</math> cm, ACLS Controls = <math>179.8 \pm 7.4</math> cm, DHS and ACLS <math>p &lt; 0.001</math></p> <p>BMI: DHS FA = <math>31.5 \pm 4.2</math>, ACLS FA = <math>31.7 \pm 4.7</math>, DHS Controls = <math>31.4 \pm 4.0</math>, ACLS Controls = <math>28.6 \pm 3.1</math>, ACLS <math>p &lt; 0.001</math></p>                                                                                                                                                                                                     | <p>Waist Circumference: DHS FA = <math>103.8 \pm 11.5</math> cm, ACLS FA = <math>105.7 \pm 12.7</math> cm, DHS Controls = <math>107.4 \pm 10.9</math> cm, ACLS Controls = <math>98.4 \pm 8.9</math> cm, DHS <math>p = 0.007</math>, ACLS <math>p &lt; 0.001</math></p> <p>Waist to Hip Ratio: DHS FA = <math>1.08 \pm 0.85</math>, ACLS FA = <math>1.06 \pm 0.73</math>, DHS Controls = <math>0.98 \pm 0.05</math>, ACLS Controls = <math>0.93 \pm 0.05</math>, DHS <math>p &lt; 0.001</math>, ACLS <math>p &lt; 0.001</math></p>                                                                                                                                                                                                                                                                                                                                                                                            |                              |
| Dey 2002     | <p>Height : PAFA = <math>171.8 \pm 5.96</math> cm, SFA = <math>170.0 \pm 5.70</math> cm, Controls = <math>163.1 \pm 6.01</math> cm, PAFA compared with SFA <math>p &lt; 0.01</math>, PAFA compared with controls <math>p &lt; 0.01</math>, SFA compared with controls <math>p &lt; 0.01</math></p> <p>Weight : PAFA = <math>66.8 \pm 6.30</math> kg, SFA = <math>72.2 \pm 6.69</math> kg, Controls = <math>64.9 \pm 4.86</math> kg, PAFA compared with SFA <math>p &lt; 0.01</math>, PAFA compared with controls <math>p &lt; 0.01</math>, SFA compared with controls <math>p &lt; 0.01</math></p> <p>BMI : PAFA = <math>22.6 \pm 1.71</math>, SFA = <math>25.0 \pm 1.60</math>, Controls = <math>24.3 \pm 1.97</math>, PAFA compared with SFA <math>p &lt; 0.01</math>, PAFA compared with controls <math>p &lt; 0.01</math>, SFA compared with controls <math>p &lt; 0.01</math></p> | <p>Waist to Hip Ratio : PAFA = <math>0.89 \pm 0.03</math>, SFA = <math>0.91 \pm 0.07</math>, Controls = <math>0.95 \pm 0.08</math>, PAFA compared with SFA <math>p</math> value not stated, PAFA compared with controls <math>p &lt; 0.01</math>, SFA compared with controls <math>p &lt; 0.01</math></p> <p>Waist to Thigh Ratio : PAFA = <math>1.53 \pm 0.09</math>, SFA = <math>1.66 \pm 0.12</math>, Controls = <math>1.87 \pm 0.24</math>, PAFA compared with SFA <math>p &lt; 0.01</math>, PAFA compared with controls <math>p &lt; 0.01</math>, SFA compared with controls <math>p &lt; 0.01</math></p> <p>Percent Body Fat : PAFA = <math>18.3 \pm 2.71\%</math>, SFA = <math>24.7 \pm 1.47\%</math>, Controls = <math>24.5 \pm 3.76\%</math>, PAFA compared with SFA <math>p &lt; 0.01</math>, PAFA compared with controls <math>p &lt; 0.01</math>, SFA compared with controls <math>p</math> value not stated</p> |                              |

| Study         | Body Weight / Anthropometrics (mean $\pm$ SD)                                                                                                                                                                                                                                                                                                                                                                                                                                                                                                                                                                                      | Body Composition (mean $\pm$ SD)                                                                                                                                                                                                                                                    | Bone Density (mean $\pm$ SD)                                                                                                                                                                                                                                                                                                                                                                                                                                                                                                                                                                                                                                                                                 |
|---------------|------------------------------------------------------------------------------------------------------------------------------------------------------------------------------------------------------------------------------------------------------------------------------------------------------------------------------------------------------------------------------------------------------------------------------------------------------------------------------------------------------------------------------------------------------------------------------------------------------------------------------------|-------------------------------------------------------------------------------------------------------------------------------------------------------------------------------------------------------------------------------------------------------------------------------------|--------------------------------------------------------------------------------------------------------------------------------------------------------------------------------------------------------------------------------------------------------------------------------------------------------------------------------------------------------------------------------------------------------------------------------------------------------------------------------------------------------------------------------------------------------------------------------------------------------------------------------------------------------------------------------------------------------------|
| Grashow 2022  | BMI: Total FA = 31.69 $\pm$ 5.12, 25-29 age FA = 30.25 $\pm$ 4.37, 30-39 age FA = 31.43 $\pm$ 5.05, 40-49 age FA = 32.21 $\pm$ 5.33, 50-59 age FA = 31.84 $\pm$ 5.27, Total NHANES Controls = 30.0 $\pm$ 7.1, 25-29 age NHANES Controls = 27.9 $\pm$ 6.9, 30-39 age NHANES Controls = 30.37 $\pm$ 8.0, 40-49 age NHANES Controls = 30.99 $\pm$ 6.6, 50-59 age NHANES Controls = 29.68 $\pm$ 6.3, Total NHIS Controls = 28.4 $\pm$ 4.8, 25-29 age NHIS Controls = 27.2 $\pm$ 5.0, 30-39 age NHIS Controls = 27.7 $\pm$ 4.7, 40-49 age NHIS Controls = 28.9 $\pm$ 4.7, 50-59 age NHIS Controls = 28.9 $\pm$ 4.8, p values not stated |                                                                                                                                                                                                                                                                                     |                                                                                                                                                                                                                                                                                                                                                                                                                                                                                                                                                                                                                                                                                                              |
| Hagmar 2006   | Height: FA = 163.5 $\pm$ 7.4 cm, Controls = 165.2 $\pm$ 7.4 cm, p value not stated<br><br>Weight: FA = 59.0 $\pm$ 7.8 kg, Controls = 66.2 $\pm$ 8.2 kg, p = 0.012<br><br>BMI: FA = 22.0 $\pm$ 2.2, Controls = 24.3 $\pm$ 2.8, p = 0.015                                                                                                                                                                                                                                                                                                                                                                                            | Percent Fat Mass: FA = 28.3 $\pm$ 7.1%, Controls = 34.5 $\pm$ 8.4%, p = 0.028<br><br>Upper Body to Lower Body Fat Mass: FA = 0.7 $\pm$ 0.2, Controls = 0.8 $\pm$ 0.2, p value not stated<br><br>Percent Lean Body Mass: FA = 68.4 $\pm$ 6.9%, Controls = 62.2 $\pm$ 7.6%, p = 0.010 | Total BMD: FA = 1.103 $\pm$ 0.108 g/cm <sup>2</sup> , Controls = 1.057 $\pm$ 0.097 g/cm <sup>2</sup> , p value not stated<br><br>Spine BMD: FA = 1.023 $\pm$ 0.139 g/cm <sup>2</sup> , Controls = 1.018 $\pm$ 0.173 g/cm <sup>2</sup> , p value not stated                                                                                                                                                                                                                                                                                                                                                                                                                                                   |
| Hurst 2010    | Height: FA = 1.9 $\pm$ 0.01 m, Controls = 1.8 $\pm$ 0.1 m, p < 0.001<br><br>Weight: FA = 111.0 $\pm$ 18.9 kg, Controls = 99.4 $\pm$ 10.9 kg, p < 0.001<br><br>BMI: FA = 31.5 $\pm$ 4.5 kg/m <sup>2</sup> , Controls = 31.0 $\pm$ 2.7 kg/m <sup>2</sup> , p = 0.18                                                                                                                                                                                                                                                                                                                                                                  | Body Surface Area: FA = 2.6 $\pm$ 0.2 m <sup>2</sup> , Controls = 2.3 $\pm$ 0.2 m <sup>2</sup> , p < 0.001                                                                                                                                                                          |                                                                                                                                                                                                                                                                                                                                                                                                                                                                                                                                                                                                                                                                                                              |
| Kettunen 2001 | Endurance FA = 24.6 $\pm$ 2.8, Track and Field FA = 25.3 $\pm$ 2.9, Team Sport FA = 26.4 $\pm$ 3.0, Power Sport FA = 28.0 $\pm$ 4.1, Marksmen FA = 25.7 $\pm$ 3.3, Controls = 26.8 $\pm$ 3.7, p values not stated                                                                                                                                                                                                                                                                                                                                                                                                                  |                                                                                                                                                                                                                                                                                     |                                                                                                                                                                                                                                                                                                                                                                                                                                                                                                                                                                                                                                                                                                              |
| Kettunen 2010 | BMI: 1985 FA = 26.1 $\pm$ 3.4, 1992 Total FA = 26.9 $\pm$ 3.5, 1992 Soccer FA = 26.8 $\pm$ 3.4, 1992 Endurance FA = 25.3 $\pm$ 2.8, 1992 Weightlifting FA = 28.7 $\pm$ 3.6, 1985 Controls = 26.4 $\pm$ 3.6, 1992 Controls = 27.9 $\pm$ 3.8, 1985 p value = 0.068, no p value stated for 1992                                                                                                                                                                                                                                                                                                                                       |                                                                                                                                                                                                                                                                                     | Femoral Neck Areal BMD: Total FA = 0.992 $\pm$ 0.169 g/cm <sup>2</sup> , Soccer FA = 1.032 $\pm$ 0.163 g/cm <sup>2</sup> , Endurance FA = 0.977 $\pm$ 0.145 g/cm <sup>2</sup> , Weightlifting FA = 0.962 $\pm$ 0.191 g/cm <sup>2</sup> , Controls = 0.905 $\pm$ 0.131 g/cm <sup>2</sup> , total athletes to controls p < 0.0001<br><br>Trochanter Areal BMD: Total FA = 0.923 $\pm$ 0.146 g/cm <sup>2</sup> , Soccer FA = 0.969 $\pm$ 0.131 g/cm <sup>2</sup> , Endurance FA = 0.885 $\pm$ 0.128 g/cm <sup>2</sup> , Weightlifting FA = 0.908 $\pm$ 0.169 g/cm <sup>2</sup> , Controls = 0.860 $\pm$ 0.121 g/cm <sup>2</sup> , total athletes to controls p = 0.0002 but adjusted for age and BMI p < 0.0001 |

| Study          | Body Weight / Anthropometrics (mean $\pm$ SD)                                                                                                                                                                                                                                                                                                                                                                                                                                                                                                                                                                                                                                                                                                                                                                                                                                                                                                                                                                                                                                                                                              | Body Composition (mean $\pm$ SD)                                                                                                                                                                                                                                                                                                                                                | Bone Density (mean $\pm$ SD) |
|----------------|--------------------------------------------------------------------------------------------------------------------------------------------------------------------------------------------------------------------------------------------------------------------------------------------------------------------------------------------------------------------------------------------------------------------------------------------------------------------------------------------------------------------------------------------------------------------------------------------------------------------------------------------------------------------------------------------------------------------------------------------------------------------------------------------------------------------------------------------------------------------------------------------------------------------------------------------------------------------------------------------------------------------------------------------------------------------------------------------------------------------------------------------|---------------------------------------------------------------------------------------------------------------------------------------------------------------------------------------------------------------------------------------------------------------------------------------------------------------------------------------------------------------------------------|------------------------------|
| Majerczak 2019 | <p>Height: Endurance FA = 175 <math>\pm</math> 5.1 cm, Sprint FA = 181 <math>\pm</math> 7.5 cm, Controls = 174 <math>\pm</math> 5.9 cm, p value not stated</p> <p>Weight : Endurance FA = 78.1 <math>\pm</math> 9.3 kg, Sprint FA = 87.8 <math>\pm</math> 11.1 kg, Controls = 79.7 <math>\pm</math> 10 kg, p &lt; 0.001</p> <p>BMI : Endurance FA = 25.7 <math>\pm</math> 3.5 kg/m<sup>2</sup>, Sprint FA = 26.8 <math>\pm</math> 3.3 kg/m<sup>2</sup>, Controls = 26.3 <math>\pm</math> 2.5 kg/m<sup>2</sup>, p value not stated</p>                                                                                                                                                                                                                                                                                                                                                                                                                                                                                                                                                                                                      | <p>Percent Body Fat: Endurance FA = 24.2 <math>\pm</math> 6.5%, Sprint FA = 24.8 <math>\pm</math> 6.5%, Controls = 26.1 <math>\pm</math> 3.9%, p value not stated</p>                                                                                                                                                                                                           |                              |
| Pihl 2003      | <p>Height: PAFA = 180 <math>\pm</math> 6.6 cm, SFA = 179 <math>\pm</math> 7.1 cm, Controls = 181.2 <math>\pm</math> 6.1 cm, p values not stated</p> <p>Weight: PAFA = 81.1 <math>\pm</math> 10.9 kg, SFA = 93.4 <math>\pm</math> 13 kg, Controls = 89.8 <math>\pm</math> 12.6 kg, PAFA to SFA p &lt; 0.001, to controls p &lt; 0.05</p> <p>BMI: PAFA = 25 <math>\pm</math> 2.4, SFA = 29.1 <math>\pm</math> 3.2, Controls = 27.3 <math>\pm</math> 3.1, PAFA to SFA p &lt; 0.001, to controls p &lt; 0.01</p>                                                                                                                                                                                                                                                                                                                                                                                                                                                                                                                                                                                                                               | <p>Percent Body Fat: PAFA = 15.9 <math>\pm</math> 5.1%, SFA = 25.3 <math>\pm</math> 4.6%, Controls = 22.8 <math>\pm</math> 5.9%, PAFA to SFA p &lt; 0.001, to controls p &lt; 0.001</p> <p>Waist to Hip Ratio: PAFA = 0.88 <math>\pm</math> 0.04, SFA = 0.94 <math>\pm</math> 0.04, Controls = 0.9 <math>\pm</math> 0.05, PAFA to SFA p &lt; 0.001, to controls p &lt; 0.05</p> |                              |
| Raty 2002      | <p>Height: Soccer FA = 177 <math>\pm</math> 5 cm, Weightlifting FA = 166 <math>\pm</math> 6 cm, Running FA = 173 <math>\pm</math> 5 cm, Marksmen FA = 175 <math>\pm</math> 7 cm, 47 year old Controls = 178.7 <math>\pm</math> 6.6 cm, 57 year old Controls = 175.1 <math>\pm</math> 6.6 cm, athletes p &lt; 0.0001, controls p &lt; 0.0001</p> <p>Weight: Soccer FA = 84 <math>\pm</math> 12.5 kg, Weightlifting FA = 78 <math>\pm</math> 13.2 kg, Running FA = 75.6 <math>\pm</math> 10 kg, Marksmen FA = 81.5 <math>\pm</math> 8.1 kg, 47 year old Controls = 85.9 <math>\pm</math> 12.4 kg, 57 year old Controls = 83.4 <math>\pm</math> 11.2 kg, athletes p = 0.034, controls p &lt; 0.001</p> <p>BMI: Soccer FA = 26.9 <math>\pm</math> 3.5 kg/m<sup>2</sup>, Weightlifting FA = 28.1 <math>\pm</math> 3.5 kg/m<sup>2</sup>, Running FA = 25.2 <math>\pm</math> 2.9 kg/m<sup>2</sup>, Marksmen FA = 26.7 <math>\pm</math> 2.6 kg/m<sup>2</sup>, 47 year old Controls = 27.1 <math>\pm</math> 3.6 kg/m<sup>2</sup>, 57 year old Controls = 27.2 <math>\pm</math> 3.4 kg/m<sup>2</sup>, athletes p = 0.016, controls p &lt; 0.0001</p> |                                                                                                                                                                                                                                                                                                                                                                                 |                              |

| Study             | Body Weight / Anthropometrics (mean ± SD)                                                                                                                                                                                                                                                                                                                                                                                                    | Body Composition (mean ± SD)                                                                                                                                                                                                                                                                                                                                                                                                                                                                                                                                                                                                                                                                                                                                                                                                                                                                                                                                                                    | Bone Density (mean ± SD)                                                                                                                                                                                                    |
|-------------------|----------------------------------------------------------------------------------------------------------------------------------------------------------------------------------------------------------------------------------------------------------------------------------------------------------------------------------------------------------------------------------------------------------------------------------------------|-------------------------------------------------------------------------------------------------------------------------------------------------------------------------------------------------------------------------------------------------------------------------------------------------------------------------------------------------------------------------------------------------------------------------------------------------------------------------------------------------------------------------------------------------------------------------------------------------------------------------------------------------------------------------------------------------------------------------------------------------------------------------------------------------------------------------------------------------------------------------------------------------------------------------------------------------------------------------------------------------|-----------------------------------------------------------------------------------------------------------------------------------------------------------------------------------------------------------------------------|
| Ravi 2020         | <p>Height: Competitive FA = 166.4 cm, Regular Physical Activity Controls = 165.6 cm, No Exercise Controls = 164.7 cm, p = 0.074</p> <p>Weight: Competitive FA = 70.3 kg, Regular Physical Activity Controls = 70.3 kg, No Exercise Controls = 68.5 kg, p = 0.182</p> <p>BMI: Competitive FA = 25.4 kg/m<sup>2</sup>, Regular Physical Activity Controls = 25.6 kg/m<sup>2</sup>, No Exercise Controls = 25.2 kg/m<sup>2</sup>, p = 0.431</p> | <p>Total Fat Mass: Competitive FA = 24.0 kg, Regular Physical Activity Controls = 25.5 kg, No Exercise Controls = 24.4 kg, p = 0.141</p> <p>Percent Fat Mass: Competitive FA = 33.3%, Regular Physical Activity Controls = 35.4%, No Exercise Controls = 35.0%, p = 0.028</p> <p>Fat Mass Index: Competitive FA = 8.7 kg/m<sup>2</sup>, Regular Physical Activity Controls = 9.3 kg/m<sup>2</sup>, No Exercise Controls = 9.0 kg/m<sup>2</sup>, p = 0.143</p> <p>Total Lean Mass: Competitive FA = 43.7 kg, Regular Physical Activity Controls = 42.1 kg, No Exercise Controls = 41.4 kg, p &lt; 0.001</p> <p>Lean Mass Index: Competitive FA = 15.8 kg/m<sup>2</sup>, Regular Physical Activity Controls = 15.3 kg/m<sup>2</sup>, No Exercise Controls = 15.2 kg/m<sup>2</sup>, p = 0.002</p> <p>Appendicular Lean Mass Index: Competitive FA = 6.9 kg/m<sup>2</sup>, Regular Physical Activity Controls = 6.6 kg/m<sup>2</sup>, No Exercise Controls = 6.6 kg/m<sup>2</sup>, p &lt; 0.001</p> | <p>Femoral Neck BMD: Competitive FA = 1.00 g/cm<sup>2</sup> (0.98-1.03), Regular Physical Activity Controls = 0.96 g/cm<sup>2</sup> (0.95-0.97), No Exercise Controls = 0.95 g/cm<sup>2</sup> (0.93-0.97), p &lt; 0.001</p> |
| Schmitt 2004      | BMI: Javelin Throwing FA = 28 [24-32], High Jumping FA = 23 [21-28], Javelin Throwing Controls = 28 [24-32], High Jumping Controls = 24 [21-28], p value not stated                                                                                                                                                                                                                                                                          |                                                                                                                                                                                                                                                                                                                                                                                                                                                                                                                                                                                                                                                                                                                                                                                                                                                                                                                                                                                                 |                                                                                                                                                                                                                             |
| Simon 2017        |                                                                                                                                                                                                                                                                                                                                                                                                                                              | Percent Body Fat: FA = 28.47 ± 6.88%, Controls = 20.89 ± 6.97%, p < 0.01                                                                                                                                                                                                                                                                                                                                                                                                                                                                                                                                                                                                                                                                                                                                                                                                                                                                                                                        |                                                                                                                                                                                                                             |
| Stracciolini 2020 | Obesity (%): FA = Yes 22/699, No 677/699, Controls = Yes 61/901, No 840/901, p = 0.001                                                                                                                                                                                                                                                                                                                                                       |                                                                                                                                                                                                                                                                                                                                                                                                                                                                                                                                                                                                                                                                                                                                                                                                                                                                                                                                                                                                 |                                                                                                                                                                                                                             |
| Unt 2008          | <p>Height: PAFA = 182.3 ± 7.0 cm, SFA = 179.3 ± 6.9 cm, Controls = 181.6 ± 5.6 cm, p value not stated</p> <p>Weight : PAFA = 84.4 ± 11.6 kg, SFA = 92.2 ± 12.9 kg, Controls = 90.9 ± 13.6 kg, PAFA compared with SFA p &lt; 0.05</p> <p>BMI : PAFA = 25.3 ± 2.4, SFA = 28.7 ± 3.1, Controls = 27.5 ± 3.4, PAFA compared with SFA p &lt; 0.001, PAFA compared with controls p &lt; 0.01</p>                                                   | <p>Percent Body Fat: PAFA = 15.9 ± 4.7%, SFA = 24.5 ± 4.7%, Controls = 22.2 ± 5.9%, PAFA compared with SFA and controls p &lt; 0.001</p>                                                                                                                                                                                                                                                                                                                                                                                                                                                                                                                                                                                                                                                                                                                                                                                                                                                        |                                                                                                                                                                                                                             |
